1 ***Pseudomonas aeruginosa* infection reveals a Caspase-1-dependent**  
2 **neutrophil pyroptosis pathway that restrains damaging Histone**  
3 **release**  
4

5 Rémi Planès<sup>1,¶</sup>, Karin Santoni<sup>1,¶</sup>, Salimata Bagayoko<sup>1</sup>, David Pericat<sup>1</sup>, Pierre-Jean  
6 Bordignon<sup>1</sup>, Audrey Hessel<sup>1</sup>, Miriam Pinilla<sup>1</sup>, Stephen-Andonai Leon-Icaza<sup>1</sup>, Elisabeth  
7 Bellard<sup>1</sup>, Serge Mazères<sup>1</sup>, Rim Abderrahim<sup>1,2</sup>, Emilie Doz-Deblauwe<sup>3</sup>, Frances  
8 Aylward<sup>1,2</sup>, Yoann Rombouts<sup>1</sup>, Nathalie Winter<sup>3</sup>, Jean-Philippe Girard<sup>1</sup>, Odile Bulet-  
9 Schiltz<sup>1,2</sup>, Christine T.N. Pham<sup>4</sup>, Mohamed Lamkanfi<sup>5</sup>, Christophe Paget<sup>6</sup>, Céline  
10 Cougoule<sup>1</sup>, Anne Gonzalez-De-Peredo<sup>1,2</sup>, Renaud Poincloux<sup>1</sup>, Emma Lefrançais<sup>1</sup> &  
11 Etienne Meunier<sup>1,#</sup>

12  
13 <sup>1</sup> Institute of Pharmacology and Structural Biology (IPBS), University of Toulouse,  
14 CNRS, Toulouse; France.

15 <sup>2</sup> Mass Spectrometry facility, Institute of Pharmacology and Structural Biology (IPBS),  
16 University of Toulouse, CNRS, Toulouse; France.

17 <sup>3</sup> INRAE, Université de Tours, ISP, Nouzilly, France.

18 <sup>4</sup> Division of Rheumatology, Department of Internal Medicine, Washington University  
19 School of Medicine, Saint Louis, Missouri 63110, USA.

20 <sup>5</sup> Department of Internal Medicine and Pediatrics, Ghent University, Ghent, Belgium.

21 <sup>6</sup> Institut national de la santé et de la recherche médicale, Centre d'Etude des  
22 Pathologies Respiratoires, UMR 1100, Tours, France.

23

24 # Address correspondence to: [etienne.meunier@ipbs.fr](mailto:etienne.meunier@ipbs.fr) (EM)

25 Present Address: Institute of Pharmacology and Structural Biology (IPBS), University  
26 of Toulouse, CNRS, Toulouse; France

27

28 ¶ These authors contributed equally to this work.

29 **Abstract**

30 Neutrophils mediate essential immune and microbicidal processes. Consequently, to  
31 counteract neutrophil attack, pathogens have developed various virulence strategies.  
32 Here, we showed that *Pseudomonas aeruginosa* (*P. aeruginosa*) phospholipase ExoU  
33 drives pathological NETosis in neutrophils. Surprisingly, inhibition of ExoU activity  
34 uncovered a fully functional Caspase-1-driven pyroptosis pathway in neutrophils.  
35 Mechanistically, activated NLRC4 inflammasome promoted Caspase-1-dependent  
36 Gasdermin-D activation, IL-1 $\beta$  cytokine release and neutrophil pyroptosis. Whereas  
37 both pyroptotic and netotic neutrophils released alarmins, only NETosis liberated the  
38 destructive DAMPs Histones, which exacerbated *Pseudomonas*-induced mouse  
39 lethality. To the contrary, subcortical actin allowed pyroptotic neutrophils to physically  
40 limit poisonous inflammation by keeping Histones intracellularly. Finally, mouse  
41 models of infection highlighted that both NETosis and neutrophil Caspase-1  
42 contributed to *P. aeruginosa* spreading. Overall, we established the host deleterious  
43 consequences of *Pseudomonas*-induced-NETosis but also uncovered an unsuspected  
44 ability of neutrophils to undergo Caspase-1-dependent pyroptosis, a process where  
45 neutrophils exhibit a self-regulatory function that limit Histone release.

46

47

48

49

50

51

52

53

54

55

56

57

58

59

60

61

62

## 63 **Introduction**

64 Over the last 30 years, non-apoptotic forms of cell death have emerged as crucial  
65 processes driving inflammation, host defense against infections but also (auto)  
66 inflammatory pathologies (Galluzzi et al., 2018).

67 Unique among all regulated cell necrosis is the capacity of granulocyte neutrophils to  
68 undergo the process of NETosis (Brinkmann et al., 2004). NETosis is an antimicrobial  
69 and pro-inflammatory form of cell death that promotes the formation of extracellular  
70 web-like structures called Neutrophil Extracellular Traps (NETs) (Brinkmann et al.,  
71 2004).

72 NETosis consists in sequential steps that start with nuclear envelope disintegration,  
73 DNA decondensation, cytosolic expansion of DNA and its subsequent expulsion  
74 through plasma membrane (Thiam et al., 2020). Completion of DNA decondensation  
75 and expulsion requires various cellular effectors. Among them, neutrophil serine  
76 proteases (Neutrophil elastase, Cathepsin G, Proteinase 3) or caspase-11 can  
77 mediate histone cleavage, which relaxes DNA tension (Chen et al., 2018; Kenny et al.,  
78 2017; Knackstedt et al., 2019; Papayannopoulos et al., 2010; Sollberger et al., 2018).  
79 In addition, granulocyte-enriched Protein arginine deaminase 4 (PAD4), citrullinates  
80 histone-bound DNA, which neutralizes arginine positive charges, thus helping nuclear  
81 DNA relaxation and decondensation (Li et al., 2010; Thiama et al., 2020; Wang et al.,  
82 2009). Then, decondensed DNA is mixed with the neutrophil cytoplasmic granule  
83 content such as NE, CathG, PR3 and Myeloperoxidase (MPO) proteins (Chen et al.,  
84 2018; Papayannopoulos et al., 2010; Thiama et al., 2020). Finally, sub-cortical actin  
85 network disassembly is required to ensure efficient DNA extrusion through the  
86 permeabilized plasma membrane (Neubert et al., 2018; Thiama et al., 2020).

87 Depending on the initial trigger, various signaling pathways such as calcium fluxes  
88 (Kenny et al., 2017; Thiama et al., 2020), necroptosis-associated MLKL  
89 phosphorylation (D’Cruz et al., 2018), ROS-induced Neutrophil protease release  
90 (Papayannopoulos et al., 2010) or endotoxin-activated caspase-11 (Chen et al., 2018,  
91 2021b; Kovacs et al., 2020) all bring neutrophil into NETosis. Common to both ROS-  
92 and caspase-11-dependent NETosis is the requirement of the pyroptosis executioner  
93 Gasdermin-D (GSDMD) cleavage by both neutrophil serine and caspase-11  
94 proteases, which triggers neutrophil NETosis (Chen et al., 2018; Sollberger et al.,  
95 2018). Specifically, active GSDMD forms a pore on PIP2-enriched domains of the  
96 plasma and nuclear membrane of neutrophils, which ensures both IL-1-related

97 cytokine release (Evavold et al., 2018; Heilig et al., 2018; Tsuchiya et al., 2021; Xia et  
98 al., 2021) and osmotic imbalance-induced DNA decondensation and expulsion (Chen  
99 et al., 2018; Sollberger et al., 2018). An intriguing feature of neutrophils is that, despite  
100 GSDMD activation, they resist canonical inflammasome-induced Caspase-1-  
101 dependent cell pyroptosis upon *Salmonella* Typhimurium and *Burkholderia*  
102 *thailandensis*-activated NLRC4 inflammasome or upon Nigericin/ATP-mediated  
103 NLRP3 inflammasome activation (Chen et al., 2014, 2018; Karmakar et al., 2020;  
104 Kovacs et al., 2020).

105 Although the importance of NETosis in host immunity to infections has been well  
106 established (Brinkmann et al., 2004; Chen et al., 2018; Kovacs et al., 2020; Li et al.,  
107 2010), NETosis dysregulation also associates to autoimmunity, host tissue damages,  
108 aberrant coagulation and thrombus that all contribute to pathology such as sepsis or  
109 autoimmune lupus (Apel et al., 2021; Biron et al., 2018; Fuchs et al., 2010; Kahlenberg  
110 et al., 2013; Knackstedt et al., 2019; Kumar et al., 2015; Lefrançois et al., 2018;  
111 Martinod et al., 2015). Specifically, *P. aeruginosa* bacterial strains that express the  
112 necrotizing ExoU phospholipase virulence factor of the patatin-like phospholipase A2  
113 family, promote organ damage-dependent acute respiratory distress syndrome  
114 (Bagayoko et al., 2021; Howell et al., 2013; Phillips et al., 2003; Sato et al., 2003).  
115 Despite seminal studies underlined that neutrophils constitute one of the primary  
116 targets of ExoU (Diaz and Hauser, 2010), their importance in ExoU-driven pathology  
117 and the associated molecular mechanisms involved remain elusive. Therefore, in this  
118 study, we explored the role of regulated neutrophil necrosis upon *P. aeruginosa*  
119 infection and addressed the molecular pathways involved.

120 Using primary murine and human neutrophils, we showed that ExoU phospholipase  
121 activity triggers pathological PAD4-dependent NETosis of neutrophils. In addition, the  
122 lack of ExoU expression unveiled a compensatory cell necrosis of neutrophils driven  
123 by the canonical inflammasome NLRC4. Specifically, NLRC4-driven neutrophil death  
124 led to an incomplete NETosis where neutrophil DNA is decondensed and fills the host  
125 cell cytosol but is not expelled out from the cells. Regarding this, whereas both netotic  
126 and pyroptotic neutrophils released HMGB1/2 DAMPs, only NETosis liberated the  
127 destructive DAMPs Histones, which contributed to *Pseudomonas*-dependent lethality.  
128 To the contrary, pyroptotic neutrophils limited poisonous inflammation by keeping  
129 DNA-bound Histones intracellularly thanks to a still assembled subcortical actin  
130 cytoskeleton. Finally, both ExoU-induced NETosis and neutrophil caspase-1 played a

131 pro-microbial role in mice by contributing to *P. aeruginosa* spreading. Overall, we  
132 established the host deleterious consequences of *Pseudomonas*-induced-NETosis  
133 and -pyroptosis of neutrophils but also uncovered an unsuspected ability of neutrophils  
134 to undergo caspase-1-dependent pyroptosis, a process where neutrophils exhibit a  
135 self-regulatory function that limit specific DAMP release.

136

## 137 **Results**

138

### 139 **NETs contribute to *Pseudomonas aeruginosa* ExoU-driven pathology**

140 In order to determine if neutrophil might be involved in pathology induced by *exoU*-  
141 expressing *P. aeruginosa* (*P. aeruginosa*<sup>ExoU</sup>), we first monitored for the presence of  
142 dying neutrophils in the lungs of infected mice. Using intravital microscopy in lungs  
143 from transgenic mice expressing GFP under the granulocyte promoter *MRP8*  
144 (*MRP8*<sup>GFP</sup>), we observed that *P. aeruginosa*<sup>ExoU</sup> triggered significant neutrophil death  
145 that exhibited extracellular DNA, a feature of NETosis (**Figure 1A, Movie S1**). Related  
146 to these observations, we detected increased amounts of netotic markers (MPO/DNA  
147 or Histone/DNA complexes) in bronchoalveolar fluids (BALFs) from mice infected with  
148 *P. aeruginosa*<sup>ExoU</sup>, whereas those markers were decreased in mice infected with *P.*  
149 *aeruginosa*<sup>ExoUS142A</sup>, carrying a catalytically inactivating mutation in *exoU* gene (**Figure**  
150 **1B**). This suggested to us that neutrophils are important targets of ExoU, and that *P.*  
151 *aeruginosa*<sup>ExoU</sup>-induced neutrophil death might contribute to pathology. A hallmark of  
152 neutrophil NETosis-mediated pathology is the dysregulated release and accumulation  
153 of DNA extracellular Traps that promote endothelial and epithelial cell damages. As  
154 addition of DNase-1 allows Neutrophil Extracellular Trap (NET) degradation and  
155 elimination, we infected mice with *P. aeruginosa*<sup>ExoU</sup> or *P. aeruginosa*<sup>ExoUS142A</sup> in  
156 presence or not of DNase-1 and monitored for mice survival, bacterial loads and NET  
157 markers (**Figures 1C, D**). The amount of NET markers in BALs of mice infected with  
158 *P. aeruginosa*<sup>ExoU</sup> were strongly decreased, although we did not detect significant  
159 induction of NETs upon infection with *P. aeruginosa*<sup>ExoUS142A</sup> (**Figure 1C**). As  
160 consequence, DNase-1 treatment improved the survival of *P. aeruginosa*<sup>ExoU</sup>-infected  
161 mice but not the overall bacterial load, suggesting that ExoU-induced NETosis mostly  
162 contributes to damage-driven lethal pathology (**Figure 1D**). Altogether, our results  
163 suggest that ExoU-induced neutrophil NETosis mostly contributes to *Pseudomonas*  
164 *aeruginosa*-dependent pathology.

## 165 **ExoU phospholipase activity drives PAD4-dependent NETosis**

166 ExoU exhibits a calcium-independent phospholipase A2 activity that triggers epithelial  
167 and macrophage cell necrosis. Therefore, we wondered if ExoU phospholipase activity  
168 could regulate neutrophil killing by ExoU. Hence, we infected WT murine bone marrow  
169 neutrophils (BMNs) or human blood neutrophils with *P. aeruginosa*<sup>ExoU</sup> (MOI2) or its  
170 isogenic mutant *P. aeruginosa*<sup>ExoUS142A</sup> (MOI2) in presence or absence of the  
171 phospholipase inhibitor MAFP. Pharmacological inhibition or genetic inactivation of  
172 ExoU phospholipase activity (ExoU<sup>S142A</sup>) inhibited ExoU-dependent plasma membrane  
173 permeabilization in murine (BMNs) and human blood neutrophils (**Figure 2A**), hence  
174 confirming the importance of the ExoU phospholipase activity at promoting neutrophil  
175 death.

176 As we observed NET markers in infected mice (**Figure 1C**), we hypothesized that  
177 ExoU-dependent neutrophil death might also promote the generation of NETs. Using  
178 scanning electron microscopy, we observed that *P. aeruginosa*<sup>ExoU</sup> stimulated a strong  
179 extracellular DNA release in BMNs, a process inhibited by the use of MAFP (**Figure**  
180 **2B**). Among others, Histone degradation and DNA citullination are two conserved  
181 mechanisms that promote DNA relaxation and delobulation (Thiam et al., 2020).  
182 Neutrophil elastase and caspase-11 promote Histone degradation (Chen et al., 2018;  
183 Sollberger et al., 2018) and PAD4 triggers Histone citrullination (Li et al., 2010; Thiam  
184 et al., 2020; Wang et al., 2009). Therefore, we first explored whether ExoU-induced  
185 neutrophil DNA delobulation and release required PAD4-dependent citrullination. We  
186 observed that *P. aeruginosa*<sup>ExoU</sup> induced PAD4-dependent Histone Citrullination  
187 (**Figure 2C**). In addition, nuclear delobulation and DNA extrusion were strongly  
188 impaired in *Pad4*<sup>-/-</sup> BMNs, suggesting that PAD4 plays a central function at driving DNA  
189 release during *P. aeruginosa*<sup>ExoU</sup> infection (**Figures 2C, D**).

190 As PAD4-mediated Histone citrullination requires calcium signaling, a process that can  
191 be mediated by membrane pore formation (Chen et al., 2018), we infected BMN  
192 neutrophils WT or deficient for various neutrophil NETosis regulators such as GP91  
193 (*GP91phox*<sup>-/-</sup>), Neutrophil Elastase, Cathepsin G, Proteinase 3 (*NE*<sup>-/-</sup> *CatG*<sup>-/-</sup> *Pr3*<sup>-/-</sup>),  
194 PAD4 (*Pad4*<sup>-/-</sup>) or Gasdermin D (*GsdmD*<sup>-/-</sup>). *GP91phox*<sup>-/-</sup>, *NE*<sup>-/-</sup> *CatG*<sup>-/-</sup> *Pr3*<sup>-/-</sup>, *Pad4*<sup>-/-</sup> and  
195 *GsdmD*<sup>-/-</sup> neutrophils all lysed (LDH release) to the same extend (**Figure 2E**). In  
196 addition, Scanning Electron Microscopy (SEM) analysis of NET formation showed no  
197 differences in the ability of *NE*<sup>-/-</sup> *CatG*<sup>-/-</sup> *Pr3*<sup>-/-</sup> or *GsdmD*<sup>-/-</sup> to go into NETosis upon *P.*  
198 *aeruginosa*<sup>ExoU</sup> whereas *Pad4*<sup>-/-</sup> showed resistance to trigger NETosis (**Figure 2F**).

199 This suggested to us that not only ExoU-induced NETosis occurs independently from  
200 classical NETotic regulators but also that ExoU-dependent neutrophil lysis could be  
201 uncoupled from PAD4-driven DNA decondensation and expulsion (referred here as  
202 NETosis). Next, we wondered about the respective importance of neutrophil lysis and  
203 PAD4-driven NETosis on the cell-autonomous immune response of neutrophils to *P.*  
204 *aeruginosa*<sup>ExoU</sup>. We infected WT or *Pad4*<sup>-/-</sup> BMNs in presence or absence of MAFP and  
205 we observed that MAFP-treated neutrophils, but not *Pad4*<sup>-/-</sup> cells had improved  
206 bacterial killing capabilities (**Figure S2A**), hence suggesting that ExoU-mediated  
207 neutrophil lysis is sufficient to escape the microbicidal action of neutrophils.  
208 Finally, we noticed that the infection of neutrophils with *P. aeruginosa*<sup>ExoU</sup> in presence  
209 of MAFP only decreased but not abrogated neutrophil plasma membrane  
210 permeabilization after 3 hours of infection (**Figure 2G**). In this context, MAFP-treated  
211 *GsdmD*<sup>-/-</sup> neutrophils showed an improved protection upon *P. aeruginosa*<sup>ExoU</sup>-induced  
212 plasma membrane permeabilization (**Figure 2**). Consequently, phospholipase  
213 inhibition by MAFP or infection with *P. aeruginosa*<sup>ExoUS142A</sup> specifically induced  
214 Caspase1- and Gasdermin-D-dependent IL1 $\beta$  release although *P. aeruginosa*<sup>ExoU</sup>  
215 triggered few or no IL1 $\beta$  release (**Figure S2B**).  
216 Altogether, our results show that *Pseudomonas aeruginosa*-induced neutrophil lysis  
217 requires ExoU phospholipase activity, which subsequently triggers PAD4-dependent  
218 DNA citrullination, decondensation and expulsion from neutrophils. In addition,  
219 inhibition of ExoU phospholipase activity uncovers a compensatory pathway that drives  
220 GasderminD-dependent neutrophil lysis and IL1 $\beta$  release upon *P. aeruginosa*  
221 infection.

222

### 223 **ExoU-deficient *P. aeruginosa* exposes a fully functional NLRP4-Caspase-1- 224 Gasdermin D-dependent pyroptosis axis in neutrophils.**

225 The observation that, in absence of ExoU phospholipase activity, GSDMD mediates  
226 neutrophil death, encouraged us to decipher the molecular mechanisms behind. The  
227 infection with *P. aeruginosa*<sup>ExoUS142A</sup> (MOI2) of WT murine neutrophils or deficient for  
228 various inflammasome sensors or signaling components, namely *Aim2*<sup>-/-</sup>, *Nlrp3*<sup>-/-</sup>,  
229 *Nlrp4*<sup>-/-</sup>, *Casp11*<sup>-/-</sup>, *Casp1*<sup>-/-</sup> and *GsdmD*<sup>-/-</sup> showed that only *Casp1*<sup>-/-</sup>, *GsdmD*<sup>-/-</sup> and  
230 *Nlrp4*<sup>-/-</sup> BMNs were protected against *P. aeruginosa*<sup>ExoUS142A</sup>-dependent cell necrosis  
231 and IL-1 $\beta$  release (**Figure 3A**). In parallel, we monitored for plasma membrane  
232 permeabilization upon infection with *P. aeruginosa*<sup>ExoUS142A</sup> (MOI2) in WT and *Casp1*<sup>-/-</sup>

233 BMNs or human blood neutrophils with (**Figures 3B, C**). Consistently, Sytox Green  
234 uptake was strongly reduced in *Casp1*<sup>-/-</sup> BMNs (**Figure 3B**), a process that the  
235 Caspase-1 inhibitor Z-YVAD also repressed in human blood neutrophils upon *P.*  
236 *aeruginosa*<sup>ExoUS142A</sup> infection (**Figure 3C**).

237 Those observations were paralleled with the detection of Caspase-1 (p20) and  
238 Gasdermin-D (p30) processing fragments in WT but not in *Nlrc4*<sup>-/-</sup> BMNs (**Figure 3D**).

239 *P. aeruginosa* flagellin and rod/needle components from its Type-3 Secretion System  
240 (T3SS) trigger NAIP-dependent NLRC4 inflammasome activation in macrophages.  
241 Similarly, the use of *P. aeruginosa*<sup>ExoU-</sup> (deficient for ExoU), *P. aeruginosa*<sup>ExoU-FliC-</sup>  
242 (lacking both ExoU and Flagellin expression) or *P. aeruginosa*<sup>ExsA-</sup> (lacking T3SS  
243 expression) strains showed that neutrophil death occurred in a T3SS and Flagellin-  
244 dependent manner (**Figure S3A**). We extended our observations to other ExoU-  
245 expressing *P. aeruginosa* (PA14, PA103) strains invalidated or not for ExoU  
246 expression. Indeed, infections of WT or *Nlrc4*<sup>-/-</sup> BMNs with PA14 and PA103 *P.*  
247 *aeruginosa* strains showed that the lack of ExoU expression also triggered NLRC4-  
248 dependent pyroptosis in neutrophils (**Figure S3B**). This, suggests that ExoU  
249 expression controls the ability of neutrophils to perform NLRC4-dependent pyroptosis.

250 Neutrophils resist NLRC4/Caspase-1-dependent pyroptosis upon *Salmonella* infection  
251 (Chen et al., 2014). Hence, to further analyze the specificity of our findings with *P.*  
252 *aeruginosa*<sup>ExoU-</sup>, we next infected WT or *Nlrc4*<sup>-/-</sup> BMNs with various bacteria (*Shigella*  
253 *flexnerii*, *Chromobacter violaceum*, *Burkholderia thailandensis*) known to trigger a  
254 NLRC4 inflammasome response and monitored for cell death and IL-1 $\beta$  release  
255 (**Figure 3E**) (Chen et al., 2014; Kovacs et al., 2020; Kumari et al., 2021; Maltez et al.,  
256 2015; Zhao et al., 2011). None of the tested bacteria triggered a significant NLRC4-  
257 dependent neutrophil lysis although they promoted NLRC4-dependent IL-1 $\beta$  release  
258 and gasdermin D processing (**Figures 3E, F**). In contrast to other bacteria, *P.*  
259 *aeruginosa* can use its Type-3 Secretion System independently of its phagocytosis  
260 (Hauser and Engel, 1999; Man et al., 2014a). Hence, we hypothesized that in  
261 neutrophils, once phagocytosed or endocytosed, bacteria might be exposed to various  
262 unknown factors able to restrict the NLRC4 inflammasome response. Regarding this,  
263 the direct electroporation of flagellin into the neutrophil host cell cytosol triggered  
264 NLRC4-dependent pyroptosis, whereas flagellin transfection, which requires the  
265 endocytic pathway to access host cell cytosol, did not lead to detectable neutrophil cell  
266 death (**Figure 3G**). This suggests that the route by which NLRC4-activating ligands



267 are delivered to the cell strongly influences the ability of neutrophils to undergo  
268 pyroptosis.

269 Finally, to determine if *P. aeruginosa*<sup>ExoUS142A</sup>-induced neutrophil NLRC4  
270 inflammasome activation also occurs *in vivo*, we infected ASC-Citrine mice with low  
271 doses ( $1 \cdot 10^5$  CFUs) of *P. aeruginosa*<sup>ExoU</sup>- or *P. aeruginosa*<sup>ExoU-/FliC-</sup>, deficient for the  
272 expression of Flagellin. ImageStreamX observation of neutrophils presenting an active  
273 ASC supramolecular speck (ASC speck<sup>+</sup>/LY6G<sup>+</sup> neutrophils) showed that *P.*  
274 *aeruginosa*<sup>ExoU</sup>- infection triggered inflammasome activation in neutrophils, which was  
275 reduced when mice were infected with *P. aeruginosa*<sup>ExoU-/FliC-</sup> (**Figure S3C**).

276 Altogether, our results show that the NLRC4/CASP1/GSDMD axis is fully functional to  
277 promote neutrophil pyroptosis in response to *P. aeruginosa* or direct Flagellin  
278 electroporation but not to the other NLRC4-activating bacteria tested, suggesting that  
279 one or many bacterial virulence or neutrophil intracellular factors might regulate the  
280 lytic threshold level of the NLRC4 inflammasome in neutrophils.

281

### 282 **Caspase-1-induced neutrophil pyroptosis generates PAD4-dependent** 283 **intracellular but not extracellular DNA structures**

284 Next, we sought to determine whether Caspase-1-induced neutrophil pyroptosis could  
285 also promote NETosis upon *P. aeruginosa*<sup>ExoUS142A</sup> infection. Scanning electron  
286 microscopy experiments showed that Caspase-1- and GasderminD-induced neutrophil  
287 pyroptosis did not efficiently generate extracellular DNA structures upon *P.*  
288 *aeruginosa*<sup>ExoUS142A</sup> infection, although *P. aeruginosa*<sup>ExoU</sup> robustly induced NETs  
289 (**Figure 4A**). Rather, immunofluorescence experiments revealed that *P.*  
290 *aeruginosa*<sup>ExoUS142A</sup> triggered efficient DNA decondensation as well as expulsion from  
291 the nuclear envelop (Lamin-B1 staining) but no or few DNA release from the neutrophil  
292 plasma membrane both in murine BMNs and human blood neutrophils (**Figure 4B**,  
293 **S4A**).

294 Next, we wondered about the mechanisms by which such process might occur.  
295 Immunoblotting and microscopy analysis of Histone citrullination showed that *P.*  
296 *aeruginosa*<sup>ExoUS142A</sup> induced a robust Histone3 (H3)-Citrullination in a NLRC4- and  
297 GasderminD-dependent manner (**Figure 4C, S4B**), a process that was also seen in  
298 human blood neutrophils (**Figure S4C, D**). Conversely, ASC-Citrine BMNs revealed  
299 that NLRC4/CASP1/GSDMD-induced DNA decondensation required PAD4 as  
300 pharmacological inhibition of PAD4 (GSK484) abrogated both Histone citrullination as

301 well as the DNA nuclear release (**Figure 4D, E**). In addition, measure of ASC specks  
302 (ASC<sup>+</sup>), cell lysis (LDH release) and IL-1 $\beta$  release in ASC-Citrine, WT, *Pad4*<sup>-/-</sup> and  
303 *Nlr4*<sup>-/-</sup> BMNs highlighted that PAD4 was not involved in *P. aeruginosa*<sup>ExoUS142A</sup>-  
304 induced NLRC4 inflammasome activation (**Figure 4D-F**).

305 Next, to determine if Caspase-1-induced neutrophil lysis and PAD4-dependent DNA  
306 decondensation plays a microbicidal function, we infected WT, *Pad4*<sup>-/-</sup> and *Nlr4*<sup>-/-</sup>  
307 BMNs with *P. aeruginosa*<sup>ExoUS142A</sup> and evaluated their cell-autonomous immune  
308 capacities. *Nlr4*<sup>-/-</sup> BMNs had improved ability to restrict *P. aeruginosa*<sup>ExoUS142A</sup>  
309 infection than WT and *Pad4*<sup>-/-</sup> neutrophils (**Figure 4G**). Such results were also  
310 observed in human blood neutrophils where only Caspase-1 inhibition (Z-YVAD) but  
311 not PAD4 inhibition (GSK484) improved neutrophil-mediated *P. aeruginosa*<sup>ExoUS142A</sup>  
312 killing (**Figure 4G**), suggesting that neutrophil pyroptosis more than PAD4-driven DNA  
313 decondensation promotes neutrophil failure to restrict *P. aeruginosa*<sup>ExoUS142A</sup>.

314 Finally, in order to determine if neutrophils can undergo Caspase-1-dependent death  
315 in mice, we infected MRP8-GFP<sup>+</sup> mice and monitored for the granulocyte death  
316 features using intravital microscopy (**Figure 4H, Movie S2**). Although necrotic  
317 granulocytes exhibited NETotic features (e.g. extracellular DNA) upon exposure to *P.*  
318 *aeruginosa*<sup>ExoU</sup>, *P. aeruginosa*<sup>ExoUS142A</sup> infection led to the appearance of swelled-  
319 round necrotic granulocytes that exhibited intracellular decondensed DNA, similarly to  
320 what we observed *in vitro* (**Figure 4H, Movie S2**). This suggests that upon lung  
321 infection, Caspase-1-induced neutrophil pyroptosis is well occurring and displays  
322 morphological and immunological distinct characteristics to NETs. All in one, our  
323 results describe an original pathway by which NLRC4-induced neutrophil pyroptosis  
324 generates PAD4-dependent intracellular but not extracellular DNA structures.

325

### 326 **Subcortical actin cytoskeleton limits the release of the damaging DAMPs** 327 **Histones upon Caspase-1-induced pyroptosis**

328 The observation that Caspase-1-induced neutrophil pyroptosis generates an  
329 “incomplete” NETosis brought the questions of what process/effectors determine the  
330 ability of DNA to breach or not the plasma membrane and what are the immunological  
331 consequences of keeping DNA intracellularly.

332 To address the first question, we took advantage of a recent study from the Waterman  
333 lab that found that stabilizing subcortical filamentous actin with the stabilizing agent  
334 jasplakinolide did not abrogate DNA decondensation but rather inhibited DNA

335 expulsion from the neutrophil upon NETosis induction (Thiama et al., 2020), an  
336 observation that our findings with *P. aeruginosa*<sup>ExoUS142A</sup> mirror. Hence, we sought to  
337 determine the behavior of filamentous actin upon both *P. aeruginosa*<sup>ExoU</sup>-induced  
338 NETosis and *P. aeruginosa*<sup>ExoUS142A</sup>-induced “incomplete” NETosis. Fluorescence  
339 microscopy observations showed that upon infection with *P. aeruginosa*<sup>ExoU</sup> NETotic  
340 neutrophils completely lost F-actin staining as well as the nuclear envelope cytoskeletal  
341 protein Lamin-B1 (**Figure 5A**). To the contrary, we observed that subcortical F-actin  
342 was condensed close to the plasma membrane upon *P. aeruginosa*<sup>ExoUS142A</sup>-induced  
343 neutrophil pyroptosis (**Figure 5A**). Such observations were also validated when we  
344 immunoblotted actin in NETotic and pyroptotic neutrophils (**Figure 5B**). Indeed, we  
345 observed a disappearance of actin in NETotic samples, whereas actin was still present  
346 in samples from pyroptotic neutrophils (**Figure 5B**). Lamin B1, an essential nuclear  
347 envelope cytoskeletal component was found to be strongly cleaved upon *P.*  
348 *aeruginosa*<sup>ExoU</sup> infection and to a lower extent by *P. aeruginosa*<sup>ExoUS142A</sup>-induced  
349 NLRC4-dependent response, suggesting that alterations of various cytoskeletal  
350 components might also account for DNA release from the nucleus (**Figure 5B**) (Knight  
351 et al., 2019; Li et al., 2020). As Lamin B1 is mostly involved at regulating nuclear  
352 integrity but not extracellular DNA release, we mostly focused on the role of actin  
353 degradation and/or F-actin destabilization at regulating DNA-breached plasma  
354 membrane of neutrophils. To address this, we infected murine neutrophils with *P.*  
355 *aeruginosa*<sup>ExoUS142A</sup> and after 2h of infection, a time where the neutrophil DNA was  
356 decondensed and could fill the intracellular compartment, we added the actin  
357 depolymerizing agent Latrunculin A and monitored for the formation of NETs (**Figure**  
358 **5C**). We controlled that Latrunculin A use did not modify *P. aeruginosa*<sup>ExoUS142A</sup>-  
359 induced neutrophil lysis (LDH release) or ASC supramolecular complexes formation  
360 (%ASC specks<sup>+</sup> cells) (**Figure 5C, S5A**). We observed that Latrunculin A-  
361 depolymerized F-actin induced the appearance of NET-like structures in *P.*  
362 *aeruginosa*<sup>ExoUS142A</sup>-infected neutrophils (**Figure 5C**). To challenge these findings, we  
363 also reasoned that if actin depolymerization could induce DNA expulsion upon  
364 pyroptosis, actin stabilization might inhibit DNA expulsion upon NETosis induction. In  
365 this context, we infected neutrophils with *P. aeruginosa*<sup>ExoU</sup> for 30 minutes as ExoU  
366 triggers a very fast neutrophil NETosis and then added the stabilizing agent  
367 jasplakinolide (**Figure S5B**). Microscopy observation and quantification of DNA able to

368 cross the plasma membrane showed that jasplakinolide-treated cells kept  
369 intracellularly their decondensed DNA upon *P. aeruginosa*<sup>ExoU</sup> infection (**Figure S5B**).  
370 These results suggest that cortical F-actin acts as a physical barrier against DNA  
371 expulsion upon neutrophil pyroptosis, a capacity that disappears in NETosis contexts.  
372 Next, we addressed the immunological relevance of pyroptotic neutrophils. We  
373 hypothesized that, contrary to NETs, pyroptotic neutrophils might keep intracellularly  
374 several DAMPs in order to lower unnecessary tissue damages.  
375 Subsequently, to determine to what extent the content of released protein might vary  
376 between neutrophil pyroptosis and NETosis, we performed a comparative mass  
377 spectrometry analysis of the secretomes of pyroptotic and NETotic neutrophils (**Figure**  
378 **5D**). To ensure a clear comparison, we set up experimental conditions where both  
379 NETotic and pyroptotic neutrophils died to the same extend (**Figure 5D**). Hence, BMNs  
380 were infected for 3 hours with *P. aeruginosa*<sup>ExoU</sup> at a MOI of 0.5 and *P.*  
381 *aeruginosa*<sup>ExoUS142A</sup> at an MOI of 2. Comparative analysis of supernatants detected  
382 approximately 450 proteins that were mostly enriched extracellularly (more than two  
383 fold) upon NETosis, including Histones core components (Histone H3) or Histone-  
384 associated proteins (Histone H1) (**Figure 5D, Table S1**). To the contrary, both  
385 pyroptotic and NETotic neutrophils released the necrotic markers Ldh or the alarmins  
386 IL36 $\gamma$ , HMGB1 and HMGB2 (Henry et al., 2016; Phulphagar et al., 2021) to a similar  
387 extend, suggesting that pyroptosis of neutrophils might interfere with the release of  
388 specific DAMPs (**Figure 5D**). These features were then further validated by  
389 immunoblotting and ELISA against HMGB1 or Histones release upon both NETosis  
390 and pyroptosis induction (**Figures 5E, S5C, D**). In those experiments, only *P.*  
391 *aeruginosa*<sup>ExoU</sup> promoted strong Histone H3 and Citrullinated Histone H3 release  
392 although HMGB1 DAMP was released in both situations (**Figures 5E, S5C, D**). In  
393 addition, we observed that latrunculin A-destabilized F-actin also induced Histone 3  
394 release upon *P. aeruginosa*<sup>ExoUS142A</sup> infection of neutrophils (**Figure 5F**). To the  
395 contrary, japlakinoloide strongly impaired ExoU-dependent release of extracellular  
396 Histones (**Figure 5F**), hence suggesting that F-actin integrity contributes to restrain  
397 DNA-associated Histone release upon neutrophil pyroptosis. When present  
398 extracellularly, Histones are extremely potent pro-inflammatory and damaging  
399 molecules (Silvestre-Roig et al., 2019; Xu et al., 2009, 2015). Indeed, direct injection  
400 of Histones into the blood stream of mice triggers a sepsis like response (Xu et al.,  
401 2009). In this context, we hypothesized that *P. aeruginosa*<sup>ExoU</sup>-induced extracellular

402 release of Histones might be an important contributor of lethality *in vivo*. Therefore, we  
403 infected mice intranasally with *P. aeruginosa*<sup>ExoU</sup> or *P. aeruginosa*<sup>ExoUS142A</sup> in presence  
404 or absence of N-Acetyl Heparin (NAH), a non-anticoagulant heparin-derived molecule  
405 that inhibits Histone mediated cellular damages (**Figures 5G, S5E**) (Wen et al., 2016;  
406 Wildhagen et al., 2014; Zhang et al., 2014). *P. aeruginosa*<sup>ExoUS142A</sup>-infected mice  
407 exhibited moderate lethality, which was not significantly modified by the use of NAH  
408 (**Figure 5G**). By contrast, NAH strongly improved survival of *P. aeruginosa*<sup>ExoU</sup>-infected  
409 mice, hence suggesting that NETosis specifically contributes to Histone-associated  
410 lethality in response to *P. aeruginosa*<sup>ExoU</sup> (**Figure 5G**).

411 Altogether, our results unveil an original process where F-actin act as physical barrier  
412 able to inhibit DNA extrusion out from neutrophils upon Caspase-1-induced pyroptosis,  
413 hence limiting Histone-mediated lethality.

414

415 **Targeting both inflammasome and ExoU phospholipase activity synergistically**  
416 **improves *P. aeruginosa* elimination.**

417 Our results showed that both NETosis and neutrophil pyroptosis are inefficient at  
418 eliminating *P. aeruginosa in vitro* and that NETosis-induced Histone release  
419 contributes to *P. aeruginosa*<sup>ExoU</sup>-driven mouse lethality. In this context, we aimed at  
420 determining the role of the Neutrophil Caspase-1 upon *P. aeruginosa* infection in mice.  
421 We infected MRP8<sup>Cre</sup>-*Casp1*<sup>flox</sup> and MRP8<sup>Cre</sup>+*Casp1*<sup>flox</sup> mice either intranasally or  
422 systemically with *P. aeruginosa*<sup>ExoU</sup> or *P. aeruginosa*<sup>ExoUS142A</sup> strains. We observed  
423 that, upon lung and systemic infections with *P. aeruginosa*<sup>ExoU</sup>, MRP8<sup>Cre</sup>+*Casp1*<sup>flox</sup> mice  
424 did not show any differences in bacterial elimination, IL1 $\beta$  production or Histone/DNA  
425 complexes presence in BALs or plasma, confirming that *P. aeruginosa*<sup>ExoU</sup> triggers  
426 successful infection independently of the inflammasome pathways (**Figures 6A-D,**  
427 **S6A**). To the contrary, MRP8<sup>Cre</sup>+*Casp1*<sup>flox</sup> mice infected with *P. aeruginosa*<sup>ExoUS142A</sup>  
428 showed a slight but significant improved bacterial elimination in lungs, a phenotype  
429 that was further amplified in systemic infection as shown in spleen, liver and lung  
430 (**Figure 6A, C**). In parallel, BAL and plasma IL-1 $\beta$  levels, but not Histone/DNA  
431 complexes, were decreased in MRP8<sup>Cre</sup>+*Casp1*<sup>flox</sup>, hence suggesting that neutrophil  
432 Caspase-1 is also a contributor of IL-1 $\beta$  production upon *P. aeruginosa*<sup>ExoUS142A</sup>  
433 infection (**Figure 6B, D**).

434 Finally, we aimed at determining if targeting both ExoU phospholipase activity and  
435 inflammasome response could synergistically protect mice against infection. Both

436 Faure et al and Cohen et al previously showed that NLRC4 in macrophages played a  
437 deleterious immune response to *P. aeruginosa* lung infection (Cohen and Prince, 2013;  
438 Faure et al., 2014). Hence, as NLRC4 in macrophages and neutrophils is of importance  
439 in *P. aeruginosa* infection, we infected WT or *Nlrc4*<sup>-/-</sup> mice with *P. aeruginosa*<sup>ExoU</sup> or *P.*  
440 *aeruginosa*<sup>ExoUS142A</sup> and monitored for mice survival and bacterial loads (**FigsS6B, C**).  
441 We observed that NLRC4 did not protect against *P. aeruginosa*<sup>ExoU</sup>-induced lethality  
442 or against bacterial growth (**FigsS6B, C**). However, *P. aeruginosa*<sup>ExoUS142A</sup> infection  
443 was strongly attenuated in WT mice, a process that was even further amplified in *Nlrc4*  
444 <sup>-/-</sup> mice that almost entirely cleared bacteria from the lung, hence suggesting that  
445 targeting both ExoU-induced lethal pathology and inflammasome-promoted bacterial  
446 growth synergistically improve both mice survival and *Pseudomonas* elimination.  
447 Altogether, our results highlight that neutrophil Caspase-1 activity contributes to *P.*  
448 *aeruginosa* spreading in mice in absence of ExoU.

449

## 450 Discussion

451 Induction of NETosis is a crucial process in the host defense against extra- and intra-  
452 cellular pathogens but its dysregulation also favors autoimmunity or infectious sepsis.  
453 Whereas infections involving *P. aeruginosa* are mostly studied through the chronic  
454 prism, which occurs with *P. aeruginosa* strains that initially express (then repress  
455 during the chronic infectious stage) the ExoS toxin, ExoU-expressing *P. aeruginosa*  
456 strains drive acute and lethal infections (Ozer et al., 2019). Here, we found that upon  
457 *P. aeruginosa*<sup>ExoU</sup> infection, neutrophils undergo pathological NETosis, which induces  
458 both aberrant NETosis-induced lethality and bacterial escape from neutrophil uptake  
459 and killing. Specifically, ExoU induces phospholipid cleavage and degradation, which  
460 triggers neutrophil lysis. Subsequently, neutrophil membrane alterations trigger PAD4  
461 activation, hence ensuring DNA relaxation and the full NETosis process. Although  
462 NE/PR3/CathG, ROS and Caspase-11 all play a strong role at promoting NETosis in  
463 various infectious and sterile contexts (Chen et al., 2018; Kenny et al., 2017;  
464 Papayannopoulos et al., 2010), none of them was important for ExoU-induced  
465 neutrophil lysis or NETosis, which suggests that additional factors might control ExoU-  
466 induced neutrophil lysis.

467 A key observation of our study was that, although neutrophils resist NLRC4- and  
468 NLRP3-induced Caspase-1-dependent pyroptosis upon various bacterial challenges  
469 (Chen et al., 2014; Karmakar et al., 2020; Kovacs et al., 2020), the lack of ExoU

470 expression induced neutrophil pyroptosis through the engagement of the fully  
471 competent canonical NLRC4 inflammasome (Sutterwala et al., 2007). In agreement  
472 with previous studies, we did not find another bacterium among the well-known  
473 bacteria that trigger NLRC4 inflammasome response able to trigger neutrophil  
474 pyroptosis in neutrophils, at the exception of the various strains of *P. aeruginosa*  
475 tested. It is clear enough that neutrophils show more resistance than macrophages to  
476 NLRC4-dependent pyroptosis (Chen et al., 2014; Heilig et al., 2018; Nichols et al.,  
477 2017), yet *P. aeruginosa*<sup>EXOUS142A</sup> still trigger neutrophil pyroptosis. This suggests to  
478 us that beyond their intrinsic resistance to pyroptosis (e.g. ESCRT machinery,  
479 Caspase-1 expression levels, Ragulator pathway...) (Bjanes et al., 2021; Chen et al.,  
480 2018; Evavold et al., 2020; Rühl et al., 2018), neutrophils might have additional factors  
481 that restrict the ability of bacteria to promote NLRC4-dependent pyroptosis. Related to  
482 this, a seminal study from Zynchlynsky and colleagues found that neutrophil serine  
483 proteases could degrade the Type-3 Secretion System and flagellin virulence factors  
484 of *S. flexneri* (Weinrauch et al., 2002), hence limiting their ability to hijack the neutrophil  
485 autonomous immunity and restraining *Shigella*-induced neutrophil necrosis. Similarly,  
486 upon *P. aeruginosa* infection, neutrophils deficient for the NADPH oxidase enzyme  
487 Nox2 undergo some low degree of caspase-1-dependent pyroptosis, which drives a  
488 deleterious response of the host (Ryu et al., 2017). As *P. aeruginosa* can inject flagellin  
489 directly through the plasma membrane in absence of phagocytosis, one could  
490 speculate that bypassing the endocytic/phagocytic pathway of neutrophils, allows  
491 escaping T3SS and flagellin degradation or ROS-mediated alterations, hence allowing  
492 direct access of large amounts of flagellin into the neutrophil cytosol. Related to this,  
493 our results show that flagellin electroporation but not its transfection promotes NLRC4-  
494 driven neutrophil pyroptosis, hence suggesting that avoiding the  
495 endocytosis/phagocytosis pathway might be sufficient to trigger NLRC4-dependent  
496 pyroptosis in neutrophils. Interestingly, Chen and colleagues recently found that upon  
497 infection with *Yersinia*, murine neutrophils induce a pyroptotic program that involves  
498 virulence-inhibited innate immune sensing, hence promoting RIPK1-induced Caspase  
499 3-dependent Gasdermin E cleavage and activation and neutrophil pyroptosis (Chen et  
500 al., 2021a), which also suggests that neutrophil pyroptosis can occur through different  
501 molecular pathways.

502 Similar to ExoU-mediated NETosis, Caspase-1 and Gasdermin-D also promoted  
503 PAD4-dependent Histone Citrullination, which stimulated DNA relaxation and release

504 from the nucleus but not its extracellular expulsion. Why upon ExoU, Caspase-11  
505 (Chen et al., 2018), MLKL (D'Cruz et al., 2018), NADPH (Kenny et al., 2017) or  
506 NE/CatG/Pr3 (Papayannopoulos et al., 2010) stimulation but not upon Caspase-1  
507 activation neutrophils generate two different types of DNA structures remains yet to be  
508 investigated. Upon Caspase1-induced pyroptosis in neutrophils, a substantial  
509 proportion of subcortical actin was still present on its Filamentous form, which in our  
510 settings constrained neutrophil DNA intracellularly whereas ExoU-stimulated  
511 neutrophils completely lost cellular F-actin network. Similarly, Thiam et al., (Thiama et  
512 al., 2020) also observed that F-actin stabilization allowed the formation these peculiar  
513 structures upon Ionomycin-induced NETosis. Interestingly, neutrophil elastase has  
514 also been shown to degrade actin (Metzler et al., 2014), hence ensuring efficient  
515 NETosis induction. This, suggests that extracellular DNA release, the final step of  
516 NETosis, might actually be a cell-regulated process involving various, yet to be  
517 determined, regulators (Neubert et al., 2018; Thiam et al., 2020). An obvious question  
518 lies on both pyroptotic Caspase-11 and necroptotic MLKL proteins and their ability to  
519 directly or indirectly induce actin degradation or F-actin destabilization, and whether  
520 additional neutrophil components also determine the ability of neutrophil to specifically  
521 control extracellular DNA release in this context.

522 Regarding the immunological purpose of Caspase-1-induced neutrophil pyroptosis, we  
523 hypothesize that, mainly due to the broad diversity of inflammasomes, Caspase-1 has  
524 more possibilities to be activated than caspase-11. One guess would be that the  
525 decondensation of DNA but its conservation into the intracellular space might be a  
526 physical mean for neutrophils to trap some intracellular DAMPs, hence avoiding their  
527 passive release and a too strong exacerbation of the inflammatory response.  
528 Regarding this, our observations that DNA-bound Histones mostly remain trapped  
529 intracellularly, but not HMGB1 alarmin, both initially located in the nucleus show that  
530 additional regulatory pathways might be involved at promoting HMGB1 release but not  
531 Histones upon neutrophil pyroptosis. In the light of the recent discovery from Kayagaky  
532 and colleagues on the role for Ninjurin-1 at promoting active cell shrinkage and  
533 HMGB1/nucleosome DAMP release downstream of Gasdermin-D pores in  
534 macrophages, the use of Ninjurin-1 deficient mice are full of promises in order to  
535 determine if neutrophil extracellular vs intracellular DNA can be a mean to trap DAMPs,  
536 hence dampening inflammatory and pathological responses (Kayagaki et al., 2021).  
537 All in one, our results unveil an unsuspected ability of neutrophils to undergo caspase-



538 1-dependent pyroptosis which drives an intriguing “incomplete NETosis”, hence  
539 expanding our understanding of neutrophil death mechanisms and opening novel  
540 research areas regarding the immunological importance of such process in various  
541 infectious and non-infectious contexts.

542

543

544

## 545 **ACKNOWLEDGEMENTS**

546 *Nlr4*<sup>-/-</sup> mice were provided by Clare E. Bryant (Man et al., 2014b) and generated by  
547 Millenium Pharmaceutical, *GsdmD*<sup>-/-</sup> mice (Demarco et al., 2020) came from P. Broz  
548 (Univ of Lausanne, Switzerland), *Casp11*<sup>-/-</sup> and *Casp1*<sup>-/-/Casp11</sup><sup>-/-</sup> came from B.  
549 Py (ENS Lyon, France) and Junying Yuan (Harvard Med School, Boston, USA) (Li et  
550 al., 1995; Wang et al., 1998). Virginie Petrilli (ENS Lyon, France) provided *Nlrp3*<sup>-/-</sup>  
551 mice that were generated by Fabio Martinon (Martinon et al., 2006). Christine T N  
552 Pham (Washington University, Seattle, USA) generated and provided the *NE*<sup>-/-/CatG</sup>  
553 <sup>-/-/Pr3</sup><sup>-/-</sup> mice (Yan et al., 2016), Thomas Henry (CIRI, Lyon, France) provided *ASC*<sup>-/-</sup>  
554 and *AIM2*<sup>-/-</sup> mice upon agreement with Genentech (San Francisco, Roche, USA) and  
555 *ASC-Citrine* (#030744) and *Pad4*<sup>-/-</sup> (#030315) mice came from Jaxson Laboratory  
556 (USA) and were generated by Douglas T Golenbock (University of Massachusetts  
557 Medical School, USA) and Kerri Mowen (The Scripps Research Institute, USA)  
558 respectively. *MRP8*<sup>Cre/Casp1</sup><sup>flox</sup> mice are provided by Natalie Winter (INRAE Tours  
559 Nouzilly, France) and were generated by crossing *MRP8*<sup>Cre</sup> (Jackson # 021614) mice  
560 with *Caspase1*<sup>flox</sup> mice generated by Mohamed Lamkanfi (Univ. of Ghent,  
561 Belgium)(Van Gorp et al., 2016). *MRP8*<sup>CreGFP</sup> and *mTmG* mice were obtained from  
562 Jackson laboratories and generated respectively by Emmanuelle Passegue (UCSF,  
563 USA) and Liqun Luo, (Stanford University, USA). *Pseudomonas aeruginosa* strains  
564 were a kind gift of Ina Attrée (CNRS, Grenoble, France) and Julien Buyck (Univ. of  
565 Poitiers, France). Authors also acknowledge the animal facility and  
566 Cytometry/microscopy platforms of the INFINITY, CBI and IPBS institutes and  
567 particularly Valerie Duplan-Eche for Imagestream acquisition and analysis. This project  
568 was funded by grants from the Fonds de Recherche en Santé Respiratoire - Fondation  
569 du Souffle to EL, ATIP-Avenir program, FRM “Amorçage Jeunes Equipes”  
570 (AJE20151034460) and the ERC (StG INFLAME 804249) to EM, the European Society  
571 of Clinical Microbiology and Infectious Diseases (ESCMID, 2020) to RP, Invivogen-

572 CIFRE collaborative PhD (to MP) and post-doctoral fellowships (to RP), from Mali and  
573 Campus France cooperative agencies to SB and of a NIH grant AR073752 to C.TN  
574 Pham. The project benefited of support from Labex/Investissements d’Avenir (French  
575 Ministry of research) and the Fondation Bettencourt to the IPBS Animal facility  
576 infrastructure development and use.

577

## 578 **AUTHOR CONTRIBUTIONS**

579 RP and EM designed the experiments. RP, KS and EM wrote the manuscript. RP and  
580 KS performed the experiments with the help of SB, DP, PJB, AH, MP, SALI, YR, RA,  
581 ED, FA, CC, AGDP, EL, RP. Specifically RP and RP performed SEM experiments, SM,  
582 EB and EL set up and performed intravital mouse experiments, RA, FA, YR and AGDP  
583 performed mass spectrometry experiments. JPG, OBS, CTNP, ML, NW and CP  
584 provided essential reagents, tools and inputs for the conduct of the project. EM, RP  
585 and KS supervised the entire study.

586

## 587 **CONFLICT OF INTEREST**

588 Authors have no conflict of interest to declare.

589

590

591

592

593

594

595

596

597

598

599

600

601

602

603

604

605

606 **Figure legends**

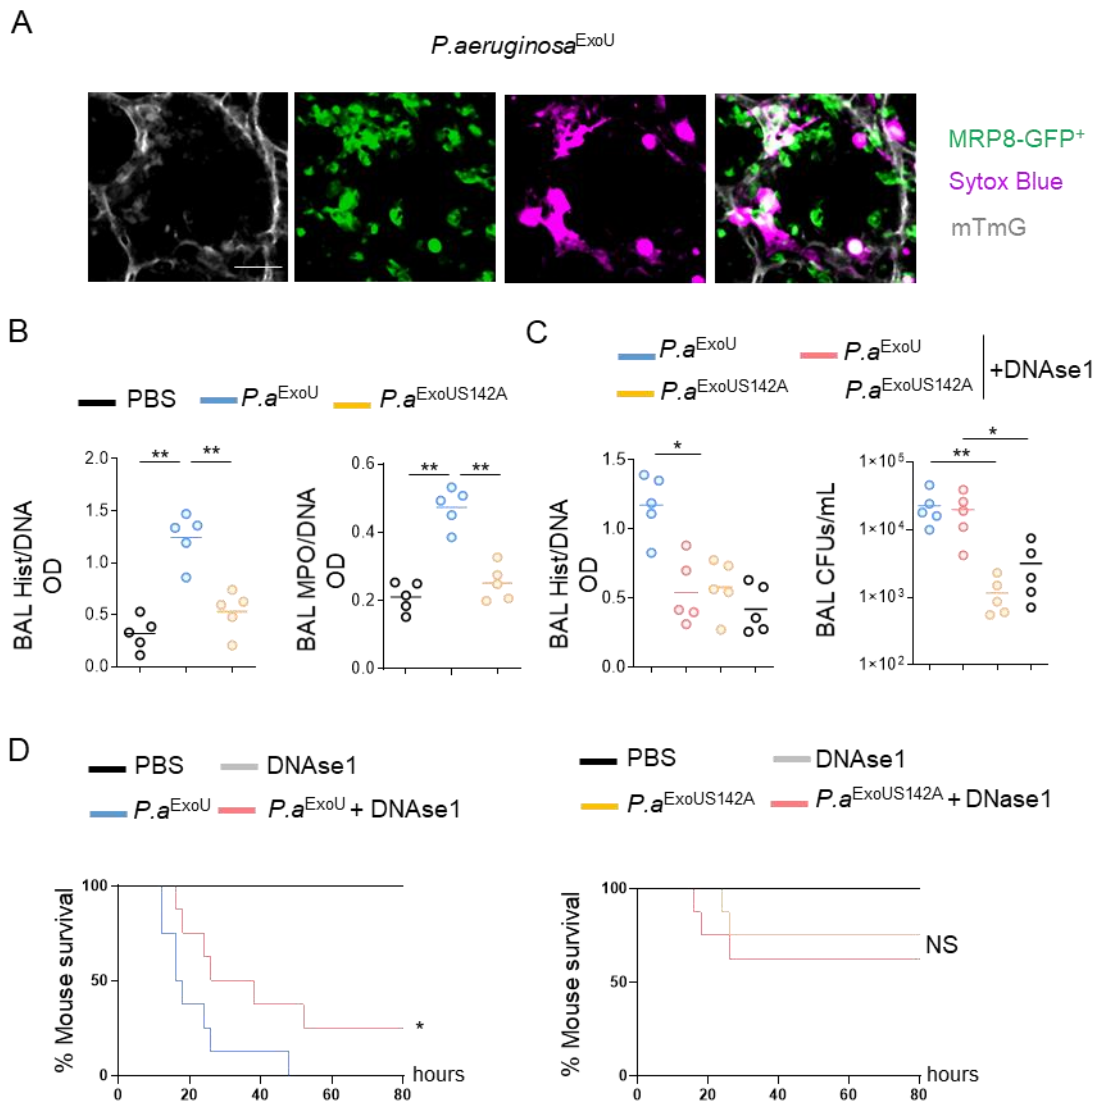

607

608 **Figure 1. ExoU-dependent NETosis exacerbates pathology induced by**  
609 ***Pseudomonas aeruginosa*.**

610 **A.** MRP8-GFP<sup>+</sup> mice were infected with 2.5.10<sup>5</sup> CFUs of *P. aeruginosa* (*P.a*)  
611 expressing *exoU* (*P.a*<sup>ExoU</sup>) in presence of SYTOX Blue for 10 hours and granulocyte  
612 death was observed in infected lungs by the appearance of SYTOX blue fluorescence.  
613 Pseudo colors represent vessels (gray, mTG); Granulocytes (Blue, MRP8-GFP<sup>+</sup>);  
614 Dead cells (Yellow, SYTOX blue). Scale bar: 20µm.

615 **B.** Histone/DNA and MPO/DNA complexes quantification in Bronchoalveolar Lavages  
616 (BALs) from WT mice intranasally infected with 2.5.10<sup>5</sup> CFUs of *P. a*<sup>ExoU</sup> or its isogenic  
617 mutant expressing a catalytically inactive form of ExoU *P. a*<sup>ExoUS142A</sup> for 10 hours.  
618 Graphs represent one experiment (5 mice/group) out of three independent *in vivo*  
619 experiments; \*\*p ≤ 0.01, Mann-Whitney analysis test.

620 **C.** BAL bacterial loads (colony forming units, CFUs) and Histone/DNA complexes  
621 quantification in WT mice intranasally infected with  $2.5 \cdot 10^5$  CFUs of *P. a<sup>ExoU</sup>* or *P.*  
622 *a<sup>ExoUS142A</sup>* for 24 hours. When indicated 4000 unit/mice of DNase 1, a NET degrading  
623 enzyme, were intranasally added both 3 and 9 hours after mice infection. Graphs  
624 represent one experiment (5 mice/group) out of three independent *in vivo* experiments;  
625 \*  $p \leq 0.05$ , \*\* $p \leq 0.01$ , Mann-Whitney analysis test.

626 **D.** Survival of WT mice intranasally infected (n=8 animals per condition) with  $5 \cdot 10^5$   
627 CFUs of *P. a<sup>ExoU</sup>* or *P. a<sup>ExoUS142A</sup>*. When specified 4000 unit/mice of DNase 1 were  
628 intranasally added 3 and 9 hours after mice infection. Graphs represent one  
629 experiment (8 mice/group) out of three independent *in vivo* experiments. Log-rank Cox-  
630 Mantel test was used for survival comparisons. \* $p \leq 0.05$

631

632

633

634

635

636

637

638

639

640

641

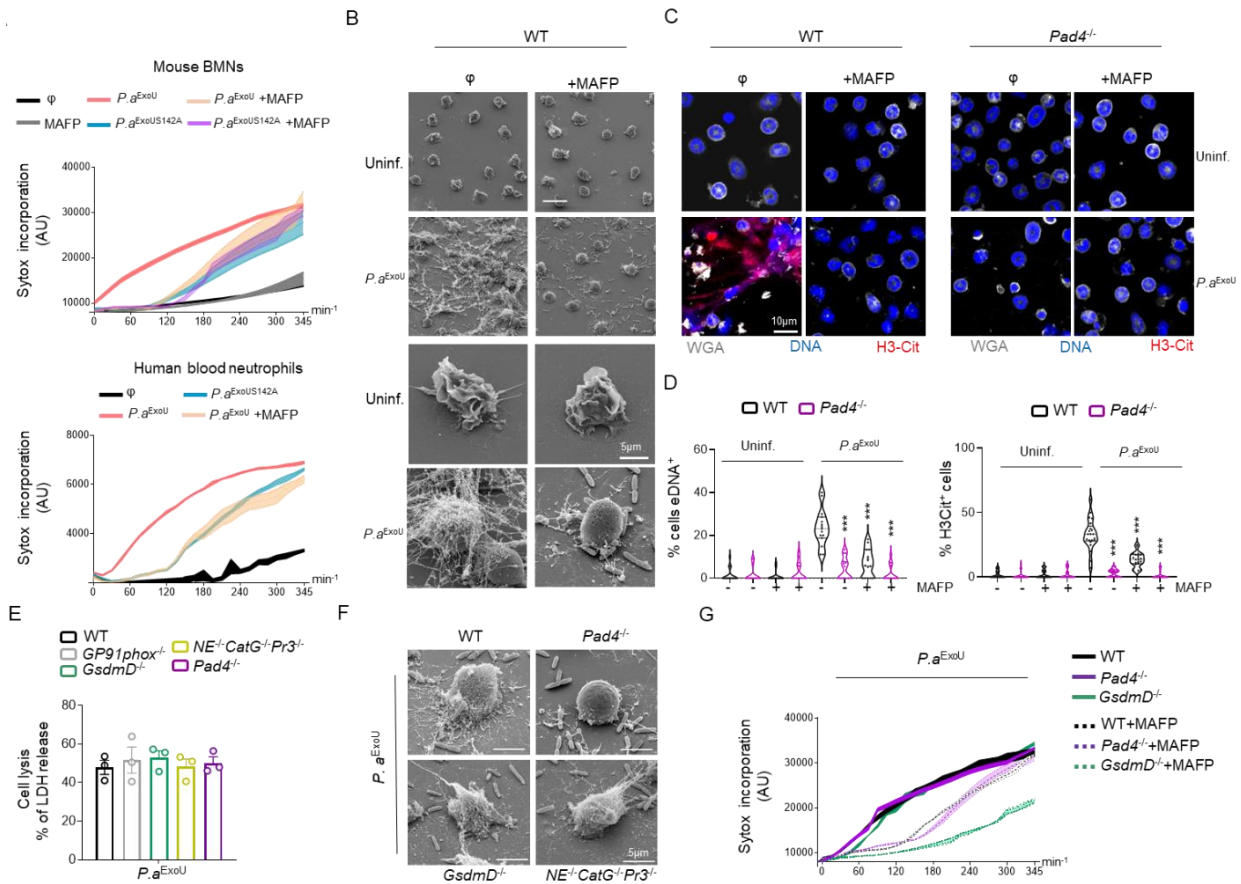

642

643 **Figure 2. ExoU phospholipase activity triggers NETosis through PAD4-**  
 644 **citrullinated Histones.**

645 Otherwise specified, neutrophils were infected with *P. aeruginosa* at a multiplicity of  
 646 infection (MOI) of 2.

647 **A.** Measure of plasma membrane permeabilization over time using Sytox Green  
 648 incorporation in WT murine Bone Marrow Neutrophils (BMNs) and in human blood  
 649 neutrophils infected with *P. a<sup>ExoU</sup>* or *P. a<sup>ExoUS142A</sup>* in presence or absence of MAFP  
 650 (20 $\mu$ M), a potent phospholipase activity inhibitor. \*\*\*p  $\leq$  0.001, T-test with Bonferroni  
 651 correction. Values are expressed as mean  $\pm$  SEM.

652 **B.** Scanning electron microscopy (SEM) observation of BMN NETosis 1h30 after *P.*  
 653 *a<sup>ExoU</sup>* infection in presence/absence of MAFP (20 $\mu$ M).

654 **C, D.** Confocal microscopy observation (C) and quantification (D) of Neutrophil  
 655 Extracellular Traps (NETs) formation in WT or *Pad4<sup>-/-</sup>* BMNs infected for 1h30 with *P.*  
 656 *a<sup>ExoU</sup>* in presence/absence of MAFP (20 $\mu$ M). Nucleus (blue) was stained with Hoescht;  
 657 Histone-3 Citrullination is in red (Anti-H3Cit staining); plasma membrane is in grey  
 658 (WGA staining). Scale bar 10 $\mu$ m. For quantifications, the percentage of cells with  
 659 extracellular DNA (eDNA<sup>+</sup>) or positives for H3Cit (H3-Cit<sup>+</sup>) was determined by

660 combining the ratios of cells positives for eDNA (outside from plasma membrane) or  
661 H3Cit over the total cellular counts from at least 10 fields from n=3 independent  
662 experiments. Values are expressed as mean  $\pm$  SEM.

663 **E.** Measure of cell lysis (release of LDH) in WT, *GP91phox*<sup>-/-</sup>, *GsdmD*<sup>-/-</sup>, *NE*<sup>-/-</sup>/*CatG*<sup>-/-</sup>  
664 */Pr3*<sup>-/-</sup> and *Pad4*<sup>-/-</sup> BMNs infected for 3 hours with *P. a*<sup>ExoU</sup>. \*\*\*p  $\leq$  0.001, T-test with  
665 Bonferroni correction.

666 **F.** Scanning electron microscopy (SEM) observation of NETosis in WT, *NE*<sup>-/-</sup>/*CatG*<sup>-/-</sup>  
667 *Pr3*<sup>-/-</sup>, *GsdmD*<sup>-/-</sup> and *Pad4*<sup>-/-</sup> BMNs 1h30 after *P. a*<sup>ExoU</sup> infection at an MOI of 2. Scale  
668 bar 5 $\mu$ m.

669 **G.** Measure of plasma membrane permeabilization over time using SYTOX Green  
670 incorporation in WT, *GsdmD*<sup>-/-</sup> or *Pad4*<sup>-/-</sup> murine BMNs infected with *P. a*<sup>ExoU</sup> or *P.*  
671 *a*<sup>ExoUS142A</sup> in presence or absence of MAFP (20 $\mu$ M). \*\*\*p  $\leq$  0.001, T-test with Bonferroni  
672 correction. Values are expressed as mean  $\pm$  SEM.

673

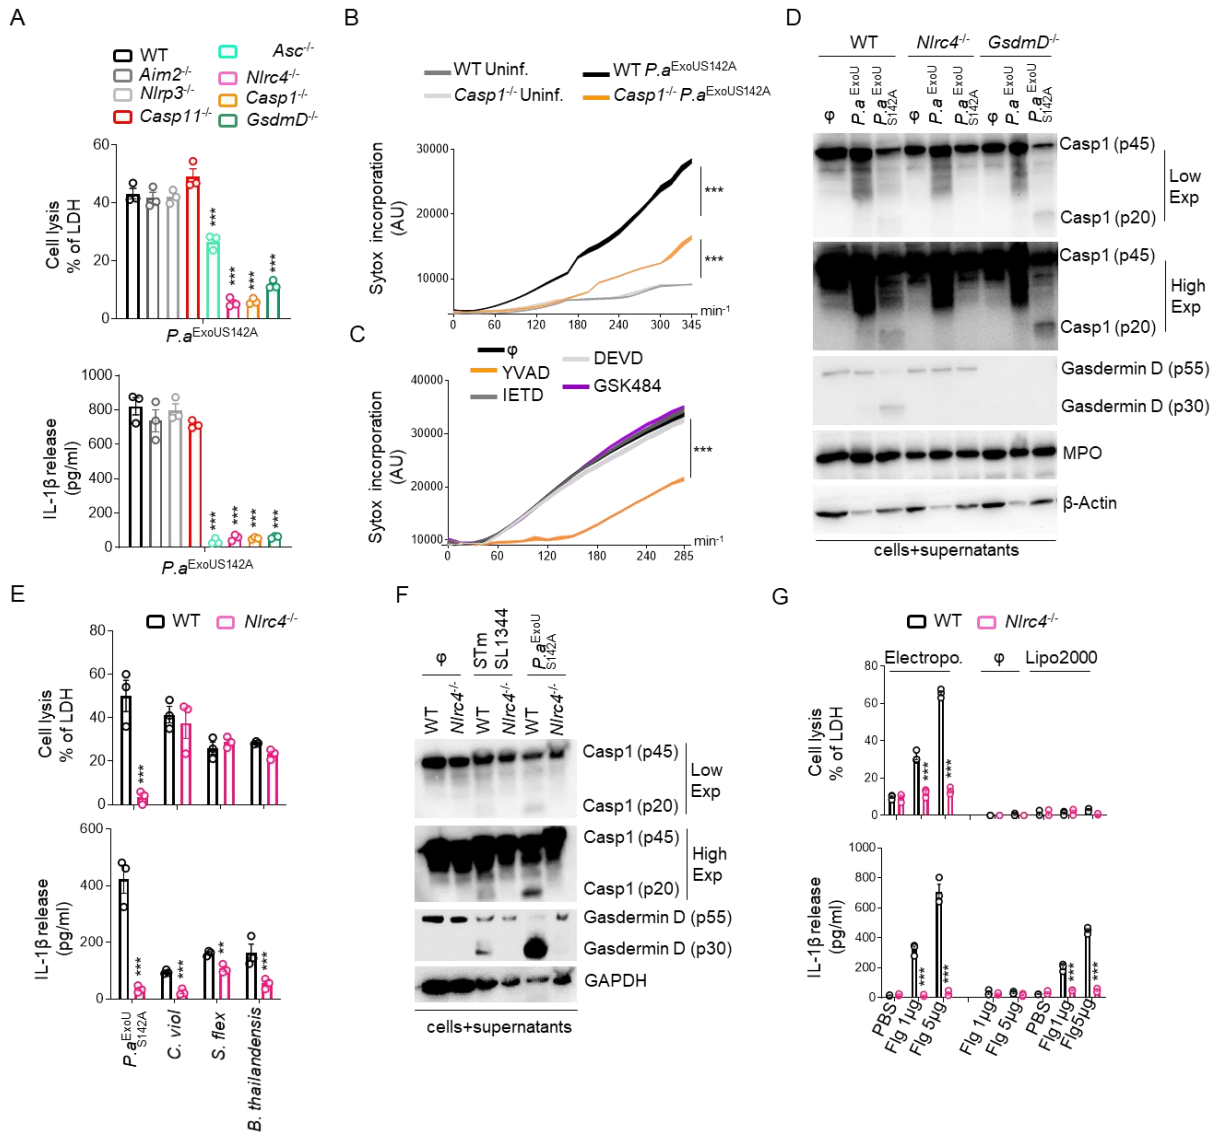

674

675 **Figure 3. *P. aeruginosa*<sup>ExoU</sup> triggers canonical NLRC4 inflammasome-dependent**  
 676 **pyroptosis in neutrophils.**

677 Otherwise specified, neutrophils were infected for 3 hours with *P. a*<sup>ExoU</sup> or *P. a*<sup>ExoUS142A</sup>  
 678 at a MOI of 2.

679 **A.** Measure of cell lysis (release of LDH) and IL-1β release in WT, *Aim2*<sup>-/-</sup>, *Nlrp3*<sup>-/-</sup>,  
 680 *Casp11*<sup>-/-</sup>, *Asc*<sup>-/-</sup>, *Nlrc4*<sup>-/-</sup>, *Casp1*<sup>-/-</sup> and *GsdmD*<sup>-/-</sup> BMNs infected for 3 hours with *P.*  
 681 *a*<sup>ExoUS142A</sup>. \*\*\**p* ≤ 0.001, T-test with Bonferroni correction. Values are expressed as  
 682 mean ± SEM.

683 **B, C.** Time course measure of plasma membrane permeabilization using SYTOX  
 684 Green incorporation in WT or *Casp1*<sup>-/-</sup> BMNs (**B**) and in human blood neutrophils (**C**)  
 685 infected *P. a*<sup>ExoUS142A</sup> in presence or absence of GSK484 (10μM, Pad4 inhibitor), Z-  
 686 IETD (20μM, Casp8 inhibitor), Z-DEVD (40μM, Casp3/7 inhibitor) or Z-YVAD (40μM,

687 Casp1 inhibitor). \*\*\* $p \leq 0.001$ , T-test with Bonferroni correction. Values are expressed  
688 as mean  $\pm$  SEM.

689 **D.** Immunoblotting of preforms of Caspase-1 (p45) and Gasdermin-D (p55), processed  
690 Caspase-1 (p20) and Gasdermin D (p30), Myeloperoxidase (MPO) and  $\beta$ -actin in WT,  
691 *Nlrc4<sup>-/-</sup>* and *GsdmD<sup>-/-</sup>* BMNs infected for 3 hours with *P. a<sup>ExoU</sup>* or *P. a<sup>ExoUS142A</sup>*.  
692 Immunoblots show combined lysates and supernatants from one experiment  
693 performed three times.

694 **E.** Measure of cell lysis (release of LDH) and IL-1 $\beta$  release in WT and *Nlrc4<sup>-/-</sup>* BMNs  
695 infected for 3 hours with *P. a exoUS<sup>142A</sup>* (MOI 2), *Chromobacter violaceum* (*C.*  
696 *violaceum*, MOI 20), *Shigella flexneri* (*S. flexneri*, MOI 40) or *Burkholderia*  
697 *thailandensis* (*B. thailandensis*, MOI 40). \*\*\* $p \leq 0.001$ , T-test with Bonferroni  
698 correction. Values are expressed as mean  $\pm$  SEM.

699 **F.** Immunoblotting of preforms of Caspase-1 (p45) and Gasdermin-D (p55), processed  
700 Caspase-1 (p20) and Gasdermin-D (p30) and GAPDH in WT and *Nlrc4<sup>-/-</sup>* BMNs  
701 infected for 3 hours with *P. a<sup>ExoUS142A</sup>* (MOI2) or *S. Typhimurium* (*S.Tm*, MOI 10).  
702 Immunoblots show combined lysates and supernatants from one experiment  
703 performed three times.

704 **G.** Measure of cell lysis (release of LDH) and IL-1 $\beta$  release in PAM3CSK4-primed WT  
705 and *Nlrc4<sup>-/-</sup>* BMNs transfected with flagellin (NLRC4 activator, 1 $\mu$ g or 5 $\mu$ g) or  
706 electroporated with 1 $\mu$ G or 5 $\mu$ g of flagellin for 3 hours. \*\*\* $p \leq 0.001$ , T-test with  
707 Bonferroni correction. Values are expressed as mean  $\pm$  SEM.

708

709

710

711



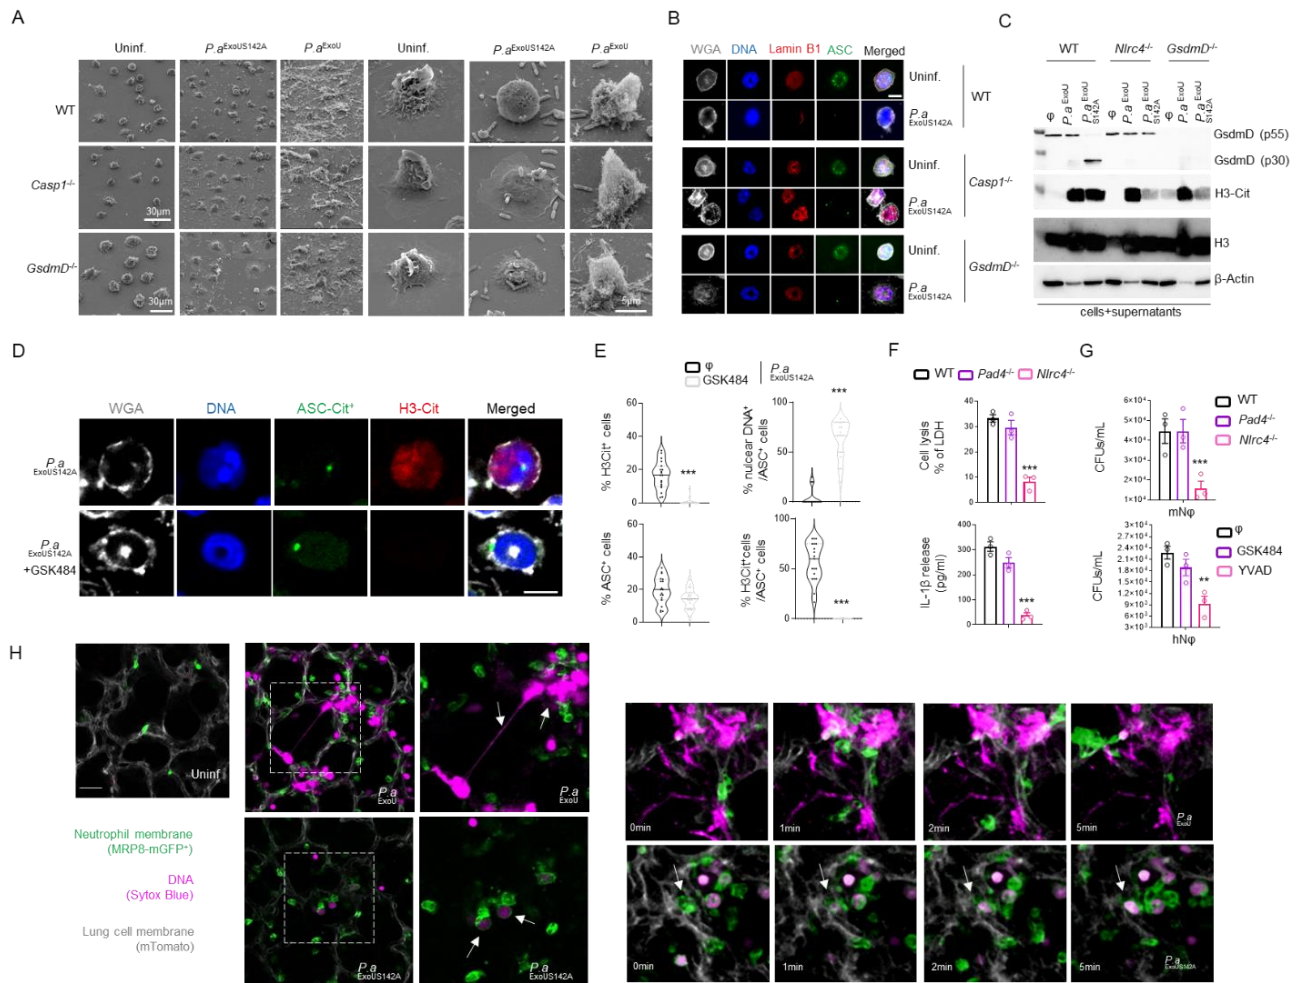

712

713 **Figure 4. Caspase-1-induced neutrophil pyroptosis generates intracellular but**  
 714 **not extracellular decondensed DNA structures in a PAD4-dependent manner**

715 **A.** Scanning electron microscopy (SEM) observation of pyroptosis in WT, *Casp1*<sup>-/-</sup> and  
 716 *GsdmD*<sup>-/-</sup> BMNs 3 hours after *P. a*<sup>ExoUS142A</sup> infection at an MOI of 2.

717 **B.** Confocal microscopy observations of *P. a*<sup>ExoUS142A</sup>-infected BMNs for 3 hours  
 718 harboring ASC complexes, decondensed DNA and nuclear membrane (LaminB1).  
 719 Nucleus (blue) was stained with Hoescht; LaminB1 is in red (anti LaminB1); ASC is in  
 720 Green (anti-ASC); plasma membrane is in grey (WGA staining). Scale bar 10µm.

721 **C.** Immunoblotting of Citrullinated Histone-3 (H3Cit), preformed and cleaved  
 722 Gasdermin-D (p55/p30) and β-Actin in WT, *Nlr4*<sup>-/-</sup> and *GsdmD*<sup>-/-</sup> BMNs infected for 3  
 723 hours with *P. a*<sup>ExoU</sup> or *P. a*<sup>ExoUS142A</sup> at an MOI of 2. Immunoblots show combined lysates  
 724 and supernatants from one experiment performed three times.

725 **D, E.** Confocal microscopy observations (**D**) and quantifications (**E**) of the percentage  
 726 of cells harboring ASC complexes, H3Cit and nuclear DNA in WT-ASC-Citrine<sup>+</sup> BMNs  
 727 infected for 3hours with *P. a*<sup>ExoUS142A</sup> in presence/absence of the PAD4 inhibitor

728 GSK484 (10 $\mu$ M). Nucleus (blue) was stained with Hoescht; Histone-3 Citrullination is  
729 in red (Anti-H3Cit staining); plasma membrane is in grey (WGA staining). Scale bar  
730 10 $\mu$ m. For quantifications, the percentage of cells with ASC complexes, nuclear DNA  
731 or positives for H3Cit (H3-Cit<sup>+</sup>) was determined by determining the ratios of cells  
732 positives for ASC speckles, nuclear DNA or H3Cit. At least 10 fields from n=3  
733 independent experiments were analyzed. Values are expressed as mean  $\pm$  SEM.

734 **F.** Measure of cell lysis (release of LDH) and IL-1 $\beta$  release in WT, *Pad4*<sup>-/-</sup> and *Nlr4*<sup>-/-</sup>  
735 BMNs infected for 3 hours with *P. a*<sup>ExoUS142A</sup>. \*\*\*p  $\leq$  0.001, T-test with Bonferroni  
736 correction. NS: Not significant. Values are expressed as mean  $\pm$  SEM.

737 **G.** Microbicidal activity of murine WT, *Nlr4*<sup>-/-</sup> and *Pad4*<sup>-/-</sup> BMNs or human blood  
738 neutrophils (3h) after infection with *P. a*<sup>ExoUS142A</sup> in presence/absence of GSK484  
739 (10 $\mu$ M, Pad4 inhibitor) or Z-YVAD (40 $\mu$ M, Casp1 inhibitor). \*\*\*p  $\leq$  0.001, T-test with  
740 Bonferroni correction. Values are expressed as mean  $\pm$  SEM.

741 **H.** Intravital microscopy visualization of granulocyte death in MRP8-GFP<sup>+</sup> mice  
742 infected with 2.5.10<sup>5</sup> CFUs of *P. a*<sup>ExoU</sup> or *P. a*<sup>ExoUS142A</sup> in presence of Sytox Blue for 10  
743 hours. Granulocyte death was observed in infected lungs by the appearance of Sytox  
744 blue fluorescence. Pseudo colors represent vessels (gray, mTG); Granulocytes (Blue,  
745 MRP8-GFP<sup>+</sup>); Dead cells (Yellow, Sytox blue). Scale bar: 20 $\mu$ m.

746

747

748

749

750

751

752

753

754

755

756

757

758

759

760

761

762

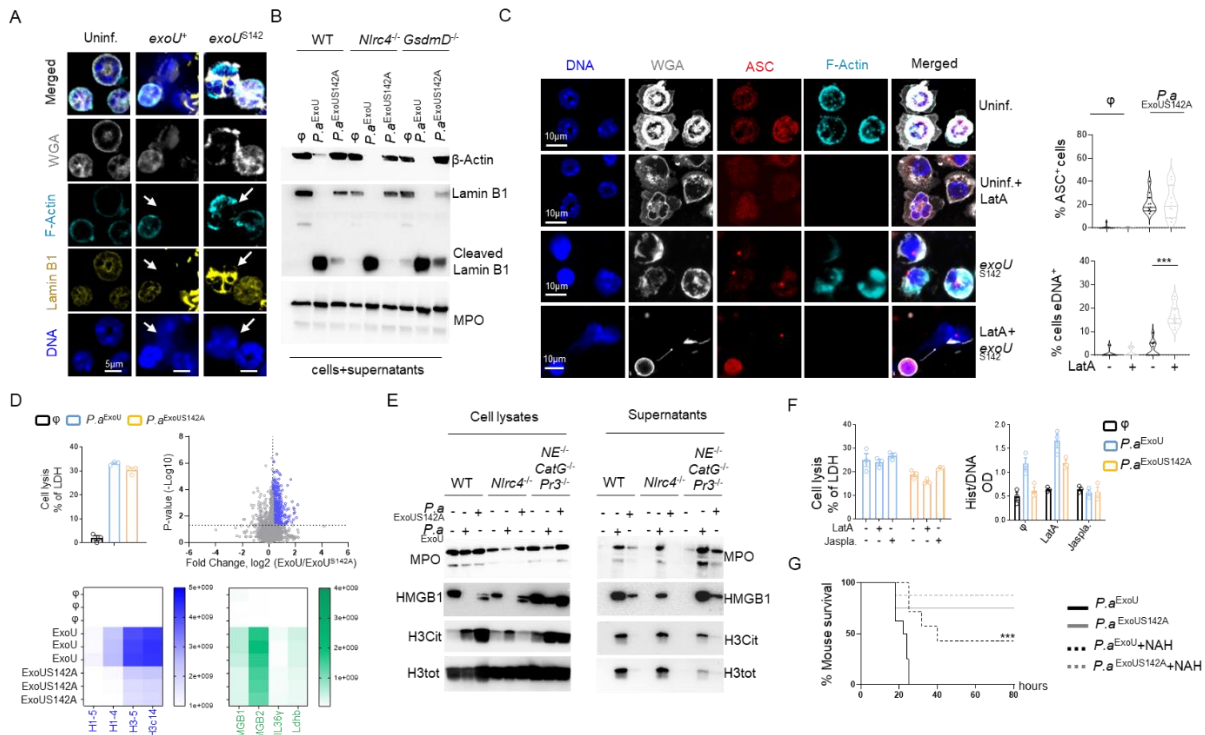

763

764 **Figure 5. Subcortical actin cytoskeleton limits DNA-associated Histone**  
 765 **exposure upon Caspase-1-induced pyroptosis**

766 **A.** Confocal microscopy observations of the presence or not of subcortical actin (F-  
 767 Actin) and nuclear envelop (lamin-B1) cytoskeleton integrity in WT BMNs infected for  
 768 3hours with *P. aExoU* or *P. aExoUS142A*. DNA (blue) was stained with Hoescht; F-Actin is  
 769 in cyan (phalloidin); Lamin-B1 is in yellow (anti-lamin-B1); plasma membrane is in grey  
 770 (WGA staining). Scale bar 10µm.

771 **B.** Immunoblotting of cytoskeletal components B-Actin, Lamin-B1, Vimentin, γ-Tubulin  
 772 WT and *Nlr4*<sup>-/-</sup> BMNs infected for 3 hours with *P. aExoU* or *P. aExoUS142A*. Immunoblots  
 773 show combined lysates and supernatants from one experiment performed three times.

774 **C.** Confocal microscopy observations and quantification determination of the presence  
 775 or not of NETs in WT-ACS-Citrine BMNs infected for 3hours with *P. aExoUS142A* in  
 776 presence or absence of Latrunculin A (2µM, actin depolymerization inducer). DNA  
 777 (blue) was stained with Hoescht; F-Actin is in cyan (phalloidin); ASC-Citrine is in red;  
 778 plasma membrane is in grey (WGA staining). Scale bar 10µm. For quantifications, the  
 779 percentage of cells with ASC positive structures (%ASC specks) or extracellular DNA  
 780 (eDNA<sup>+</sup>) was determined by combining the ratios of cells positives for eDNA (outside  
 781 from plasma membrane) over the total cellular counts from at least 10 fields from n=3  
 782 independent experiments. Values are expressed as mean ± SEM.

783 **D.** Cell lysis (LDH release), volcano plot and heat map showing released factors by  
784 netotic and pyroptotic BMNs infected for 3 hours with *P. a<sup>ExoU</sup>* (MOI 0.5) or *P. a<sup>ExoUS142A</sup>*  
785 (MOI 2). Vocano plot show the fold enrichment of released factors induced by *P. a<sup>ExoU</sup>*  
786 over *P. a<sup>ExoUS142A</sup>*. Heat map show the extracellular abundance of selected DAMPs  
787 (Blue; Histones/Green; selected DAMPs). Data are as representative of three  
788 biological replicates plotted.

789 **E.** Immunoblotting observation of the release of Histone 3, Histone-3 Cit, HMGB1,  
790 MPO in supernatant or lysates from pyroptotic and NETotic BMNs infected for 3 hours  
791 with *P. a<sup>ExoU</sup>* (MOI 0.5) or *P. a<sup>ExoUS142A</sup>* (MOI2). Immunoblots show separated lysates  
792 and supernatants from one experiment performed three times.

793 **F.** Measure of cell lysis (release of LDH) and Histone/DNA complexes release in WT  
794 BMNs infected for 3 hours with *P. a<sup>ExoU</sup>* (MOI 0.5) or *P. a<sup>ExoUS142A</sup>* (MOI2). \*\*\* $p \leq 0.001$ ,  
795 T-test with Bonferroni correction. NS: Not significant. Values are expressed as mean  
796  $\pm$  SEM.

797 **G.** Measure of cell lysis (release of LDH) and Histone/DNA complexes release in WT  
798 BMNs infected for 3 hours with *P. a<sup>ExoU</sup>* (MOI 0.5) or *P. a<sup>ExoUS142A</sup>* (MOI 2) in  
799 presence/absence of actin stabilizing agent jasplakinoid (200nM) or with actin  
800 depolymerising molecule Latrunculin A (2 $\mu$ M). \*\*\* $p \leq 0.001$ , T-test with Bonferroni  
801 correction. NS: Not significant. Values are expressed as mean  $\pm$  SEM.

802 **H.** Survival of WT mice intranasally infected (n=8 animals per condition) with  $5.10^5$   
803 CFUs of *P. a<sup>ExoU</sup>* or *P. a<sup>ExoUS142A</sup>*. To ensure both BAL and lung access, PBS or NAH  
804 were added both via orbital (15mg/kg) and intranasal (5mg/kg) injections 3 and 9 hours  
805 after mice infection. Graphs represent one experiment (8 mice/group) out of three  
806 independent in vivo experiments. Log-rank Cox-Mantel test was used for survival  
807 comparisons. \*\*\* $p \leq 0.001$ .

808

809

810

811

812

813

814

815

816

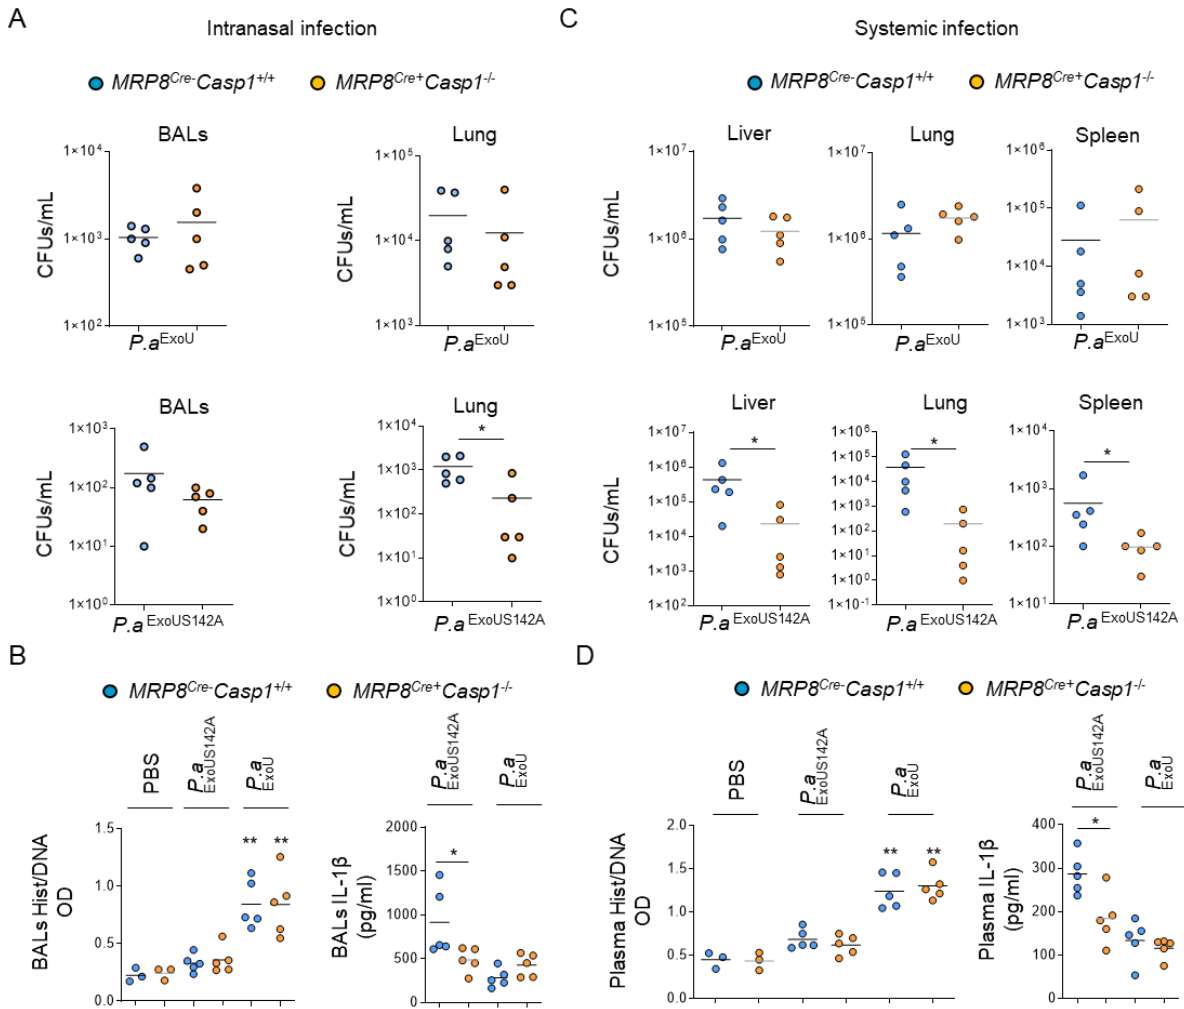

817

818 **Figure 6. Targeting both neutrophil Caspase-1 and ExoU phospholipase activity**  
 819 **synergistically improves *P. aeruginosa* elimination in mice.**

820 **A.** BAL and lung bacterial loads (colony forming units, CFUs) in *MRP8<sup>Cre</sup>-Casp1<sup>fllox</sup>* and  
 821 *MRP8<sup>Cre</sup>+Casp1<sup>fllox</sup>* mice intranasally infected with  $5 \cdot 10^5$  CFUs of *P. a<sup>ExoU</sup>* or *P.*  
 822 *a<sup>ExoUS142A</sup>* for 24 hours. Graphs represent one experiment (5 mice/group) out of three  
 823 independent *in vivo* experiments; \*  $p \leq 0.05$ , \*\* $p \leq 0.01$ , Mann-Whitney analysis test.

824 **B.** BAL Histone/DNA complexes IL-1 $\beta$  quantifications in *MRP8<sup>Cre</sup>-Casp1<sup>fllox</sup>* and  
 825 *MRP8<sup>Cre</sup>+Casp1<sup>fllox</sup>* mice intranasally infected with  $5 \cdot 10^5$  CFUs of *P. a<sup>ExoU</sup>* or *P.*  
 826 *a<sup>ExoUS142A</sup>* for 10 hours. Graphs represent one experiment (5 mice/group) out of three  
 827 independent *in vivo* experiments; \*  $p \leq 0.05$ , \*\* $p \leq 0.01$ , Mann-Whitney analysis test.

828 **C.** Liver, spleen and lung bacterial loads (CFUs) in *MRP8<sup>Cre</sup>-Casp1<sup>fllox</sup>* and  
 829 *MRP8<sup>Cre</sup>+Casp1<sup>fllox</sup>* mice 24 hours after systemic infection with  $1 \cdot 10^7$  CFUs (5  
 830 mice/group) of *P. a<sup>ExoU</sup>* or *P. a<sup>ExoUS142A</sup>*. Graphs represent one experiment (5  
 831 mice/group) out of three independent *in vivo* experiments; \*  $p \leq 0.05$ , \*\* $p \leq 0.01$ , Mann-  
 832 Whitney analysis test.

833 **D.** Determination of plasma Histone/DNA complexes and IL-1 $\beta$  levels in MRP8<sup>Cre</sup>-  
834 *Casp1*<sup>flox</sup> and MRP8<sup>Cre</sup>+ *Casp1*<sup>flox</sup> mice at 10 hours after systemic infection with 1.10<sup>7</sup>  
835 CFUs (5 mice/group) of *P. a*<sup>ExoU</sup> or *P. a*<sup>ExoUS142A</sup>. Graphs represent one experiment (5  
836 mice/group) out of three independent *in vivo* experiments; \* p  $\leq$  0.05, \*\*p  $\leq$  0.01, Mann-  
837 Whitney analysis test.

838  
839  
840

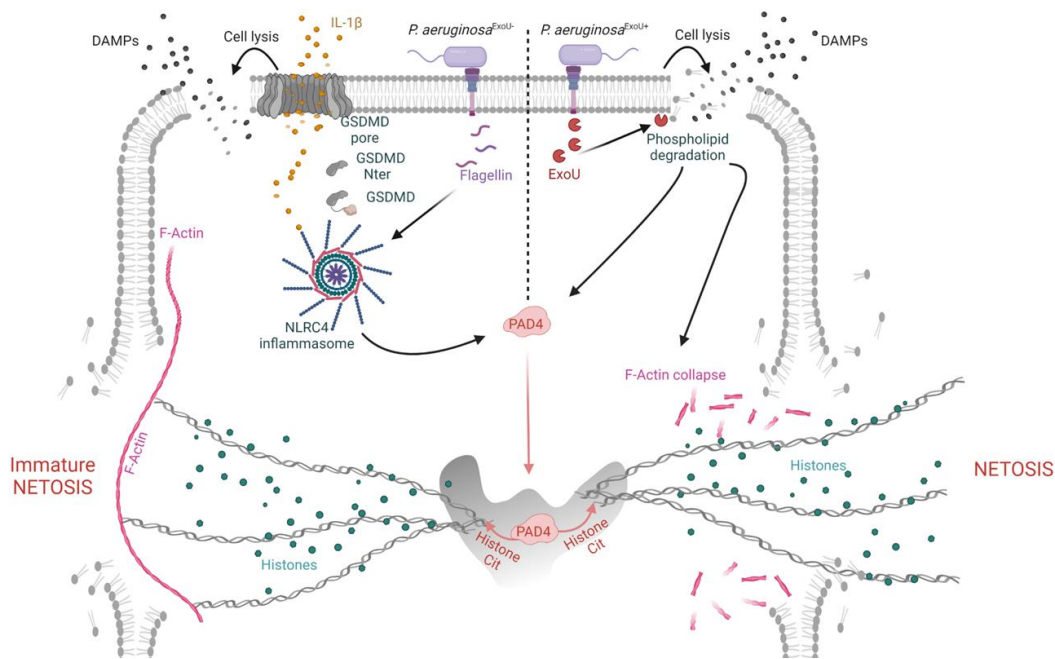

841  
842 **Graphical abstract.** *P.aeruginosa*<sup>ExoU</sup> (right) triggers phospholipid degradation and  
843 subsequent neutrophil lysis that associates to NETosis through F-Actin  
844 collapse/degradation and PAD4-dependent DNA decondensation. *P.aeruginosa*<sup>ExoU-</sup>  
845 (left) triggers NLRC4-dependent pyroptosis in neutrophils, which leads to PAD4-  
846 dependent DNA decondensation but not expulsion due to a still function subcortical F-  
847 Actin network. Created with Biorender.com.

848  
849  
850  
851  
852  
853  
854  
855

## 856 **STAR Methods**

857

858 All reagents, concentrations of use and their references are listed in the **Reagent Table**

859

## 860 **Mice**

861 *Nlrc4*<sup>-/-</sup> (Man et al., 2014b), *Nlrp3*<sup>-/-</sup> (Martinon et al., 2006), *ASC*<sup>-/-</sup>, *Casp11*<sup>-/-</sup> (Li et al.,  
862 1995; Wang et al., 1998), *Casp1*<sup>-/-</sup>*Casp11*<sup>-/-</sup> (Li et al., 1995; Wang et al., 1998),  
863 *GsdmD*<sup>-/-</sup>, *Aim2*<sup>-/-</sup>, *Pad4*<sup>-/-</sup>, *Gp91phox*<sup>-/-</sup>, *NE*<sup>-/-</sup>*CatG*<sup>-/-</sup>*Pr3*<sup>-/-</sup> (Yan et al., 2016),  
864 *ASC*<sup>Citrine</sup>, *MRP8*<sup>Cre+</sup>*GFP*<sup>+</sup> were generated and described in previous studies. Mice  
865 were bred at the IPBS (Toulouse, France) and INRAE (Tours Nouzilly, France) animal  
866 facilities in agreement to the EU and French directives on animal welfare (Directive  
867 2010/63/EU). Charles Rivers provided WT C57BL/6 mice. Mice experiments are under  
868 legal authorizations APAFIS#8521-2017041008135771 and APAFIS#12812-  
869 2018031218075551, according to the local, French and European ethic laws.

870

## 871 **MRP8<sup>Cre</sup>Casp1<sup>flox</sup> mice genotyping**

872 *Casp1*<sup>flox/flox</sup> mice were crossed to *MRP8*<sup>Cre</sup> mice to generate *MRP8*<sup>Cre</sup>*Casp1*<sup>flox</sup>.  
873 *Caspase-1* genotyping was performed using Primer Fw:  
874 CGAGGGTTGGAGCTCAAGTTGACC and Primer Rv:  
875 CACTTTGACTTCTCTAAGGACAG. *Cre* genotyping was performed using Primers Fw:  
876 CGCCGTAAATCAATCGATGAGTTGCTTC and Primers Rv:  
877 GATGCCGGTGAACGTGCAAAACAGGCTC.

878

## 879 **Bacterial cultures**

880 *P. aeruginosa* strains (PP34, PA14, PA103) and their isogenic mutants were grown  
881 overnight in Luria Broth (LB) medium at 37°C with constant agitation. Otherwise  
882 specified, all along the study the clinical isolate PP34, referred as *P.a*<sup>ExoU</sup>, or its  
883 isogenic mutants referred as *P.a*<sup>ExoUS142A</sup>, *P.a*<sup>ExoU-</sup>, *P.a*<sup>ExoU-FliC-</sup>, *P.a*<sup>ExsaA-</sup> were used.  
884 Bacteria were sub-cultured the next day by diluting overnight culture 1:25 and grew  
885 until reaching an optical density (OD) O.D.600 of 0.6 – 0.8. Bacterial strains and their  
886 mutants are listed in reagent table.

887

888

## 889 **Mice infections**

890 Age and sex-matched animals (5–8 weeks old) per group were infected intravenously  
891 (venous-orbital, 50 $\mu$ L with  $1.10^7$ CFUs) or intranasally with  $5.10^5$  (lethal doses) or  
892  $2.5.10^5$  CFUs of various *P. aeruginosa* strains suspended in 25 $\mu$ L of PBS. When  
893 specified, intranasal addition of PBS, DNase 1 (4000U/mouse) or N-Acetyl Heparin  
894 (NAH) were performed 3 and 9 hours after infections. Specifically, NAH was injected  
895 both by intranasal aspiration (25  $\mu$ L/mouse, 5mg/kg) and by orbital injection  
896 (50 $\mu$ L/mouse, 15mg/kg) 3 and 9 hours after infection to ensure both lung and BAL  
897 access of NAH. Animals were sacrificed at indicated times after infection and  
898 bronchoalveolar fluids (BALFs), blood and lungs were recovered. When specified,  
899 bacterial loads (CFU plating), cytokine levels (ELISA) and NET complexes (MPO/DNA,  
900 Histone/DNA, ELISA) were evaluated. No randomization or blinding were done.

901

### 902 **Intravital microscopy experiments**

903 We relied on the previously published lung intravital microscopy method using an  
904 intercoastal thoracic window (Headley et al., 2016; Looney et al., 2011), adapted at the  
905 IPBS CNRS-University of Toulouse TRI platform.

906 MRP8-mTmG mice (8-12 weeks old) were infected intratracheally with  $5.10^5$  CFUs of  
907 *P. aeruginosa* ExoU or ExoU<sup>S142A</sup> strains resuspended in 50 $\mu$ L of PBS and imaged 6  
908 to 8 hours after infection. 50 $\mu$ L of 50 $\mu$ M solution of Sytox blue (Life Technologies) was  
909 injected both intravenously (retroorbital) and intratracheally just before imaging to  
910 visualize extracellular DNA.

911 Next, mice were anesthetized with ketamine and xylazine and secured to a microscope  
912 stage. A small tracheal cannula was inserted, sutured and attached to a MiniVent  
913 mouse ventilator (Harvard Apparatus). Mice were ventilated with a tidal volume of 10  
914  $\mu$ l of compressed air (21% O<sub>2</sub>) per gram of mouse weight, a respiratory rate of 130-  
915 140 breaths per minute, and a positive-end expiratory pressure of 2-3 cm H<sub>2</sub>O.  
916 Isoflurane was continuously delivered to maintain anesthesia and 300  $\mu$ l of 0.9% saline  
917 solution were i.p. administered in mice every hour for hydration. Mice were placed in  
918 the right lateral decubitus position and a small surgical incision was made to expose  
919 the rib cage. A second incision was then made into the intercostal space between ribs  
920 4 and 5, through the parietal pleura, to expose the surface of the left lung lobe. A  
921 flanged thoracic window with an 8 mm coverslip was inserted between the ribs and  
922 secured to the stage using a set of optical posts and a 90° angle post clamp (Thor  
923 Labs). Suction was applied to gently immobilize the lung (Dexter Medical). Mice were



924 placed in 30°C heated box during microscopy acquisition to maintain the body  
925 temperature and the 2-photon microscope objective was lowered over the thoracic  
926 window. Intravital imaging was performed using a Zeiss 7MP upright multi-photon  
927 microscope equipped with a 20×/1.0 objective and a Ti-Sapphire femtosecond laser,  
928 Chameleon-Ultra II (Coherent Inc.) tuned to 920 nm. Sytox Blue, GFP and Tomato  
929 emission signals were detected thanks to the respective bandpass filters: Blue  
930 (SP485), Green (500-550) and Red (565-610). Images were analyzed using Imaris  
931 software (Bitplane) and Zen (Zeiss).

932

### 933 **Isolation of primary murine neutrophils**

934 Murine Bone marrow cells were isolated from tibias and femurs, and neutrophils were  
935 purified by positive selection using Anti-Ly-6G MicroBead Kit (Miltenyi Biotech)  
936 according to manufacturer's instructions. This process routinely yielded >95% of  
937 neutrophil population as assessed by flow cytometry of Ly6G<sup>+</sup>/CD11b<sup>+</sup> cells.

938

### 939 **Isolation of primary human neutrophils**

940 Whole blood was collected from healthy donors by the "Ecole française du sang" (EFS,  
941 Toulouse Purpan, France) in accordance with relevant guidelines. Written, informed  
942 consent was obtained from each donor. Neutrophils were then isolated by negative  
943 selection using MACSxpress® Whole Blood Human Neutrophil Isolation Kit (Miltenyi  
944 Biotech) according to manufacturer's instructions. Following isolations cells were  
945 centrifuged 10 min at 300 g and red blood cells were eliminated using Red blood cells  
946 (RBC) Lysis Buffer (BioLegend). This procedure gives >95% of neutrophil population  
947 as assessed by flow cytometry of CD15<sup>+</sup>/CD16<sup>+</sup> cells. License to use human samples  
948 is under legal agreement with the EFS; contract n° 21PLER2017-0035AV02, according  
949 to Decret N° 2007-1220 (articles L1243-4, R1243-61).

950

### 951 **Cell plating and treatment of Neutrophils**

952 Following isolation, Neutrophils were centrifugated for 10 min at 300 g and pellet was  
953 resuspendent in serum free OPTI-MEM medium. Absolute cell number was  
954 determined with automated cell counter Olympus R1 with trypan blue cell death  
955 exclusion method (typically living cells represent >70% of cell solution) and cell density  
956 was adjusted at 10<sup>6</sup> / mL by adding OPTI-MEM culture medium. Neutrophils were then  
957 plated in either 96 well plates, 24 well plates or 6 well plates with 100 µL (10<sup>5</sup> cells),

958 500  $\mu\text{L}$  ( $5 \cdot 10^5$  cells) or 2 mL ( $2 \cdot 10^6$  cells) respectively. When indicated cells were  
959 primed with Pam<sub>3</sub>CSK<sub>4</sub> (100 ng/ml) or LPS (100 ng/ml) for 2 hrs and/or incubated with  
960 chemical inhibitors Z-VAD-fmk (20  $\mu\text{M}$ ), Y-VAD-fmk (40  $\mu\text{M}$ ), GSK484 (10  $\mu\text{M}$ ),  
961 Latrunculin A (2  $\mu\text{M}$ ), Jasplakinolide (200 nM) as indicated in each experimental  
962 setting. Neutrophils were infected with various bacterial strains and multiplicity of  
963 infections (M.O.I.) as indicated.

964

### 965 **Electroporation / transfection of flagellin**

966 Before electroporation/transfection neutrophils were first primed with Pam<sub>3</sub>CSK<sub>4</sub> (1  
967  $\mu\text{g} \cdot \text{mL}^{-1}$ ) for 2 hrs, and washed with PBS. Recombinant flagellin (FLA-PA, invivoGen)  
968 1 to 5  $\mu\text{g}$  was electroporated into  $\sim 2.0 \times 10^6$  cells in 20  $\mu\text{L}$  of Tampon R (R buffer) using  
969 the Neon transfection system (Life Technologies). Settings were the following: 1720  
970 Voltage, 10 Width, 2 Pulse. After electroporation cells were plated in 6 or 24 well plates  
971 and incubated for 3hrs before further experiments. For transfection, 1 to 5  $\mu\text{g}$  of flagellin  
972 was mixed with 0.1% v/v Lipofectamine 2000 (Life Technologies) in Optimem medium,  
973 incubated for 5 min at room temperature, and transfected into  $\sim 2.0 \times 10^6$  cells in 6 or  
974 24 well plates. Cells were incubated for 4hrs before further manipulations.

975

### 976 **Kinetic analysis of Neutrophil's permeability by SYTOX Green incorporation** 977 **assay**

978 Cells are plated at density of  $1 \times 10^5$  per well in Black/Clear 96-well Plates (REF) in  
979 OPTI-MEM culture medium supplemented with SYTOX-Green dye (100ng/mL) and  
980 infected/treated as mentioned in figure legend. Green fluorescence are measured in  
981 real-time using Clariostar plate reader equipped with a 37°C cell incubator.

982

### 983 **ELISA and plasma membrane lysis tests**

984 Cell death was measured by quantification of the lactate dehydrogenase (LDH) release  
985 into the cell supernatant using LDH Cytotoxicity Detection Kit (Takara). Briefly, 100  $\mu\text{L}$   
986 cell supernatant were incubated with 100  $\mu\text{L}$  LDH substrate and incubated for 15 min.  
987 The enzymatic reaction was stopped by adding 50  $\mu\text{L}$  of stop solution. Maximal cell  
988 death was determined with whole cell lysates from unstimulated cells incubated with  
989 1% Triton X-100. Human and mouse IL-1 $\beta$  secretion was quantified by ELISA kits  
990 (Thermo Fisher Scientific) according to the manufacturer's instructions.

991

## 992 **Quantification of NETs**

993 Histone/DNA complexes in cells supernatant or serum sample were quantified using  
994 Cell Death Detection ELISA<sup>PLUS</sup> according to manufacturer's instructions (roche).  
995 MPO/DNA complexes was assessed as describes previously (Lefrançais et al., 2018).  
996 Citrullinated Histone H3/DNA complexes quantification assay was build "in house" and  
997 performed similarly to standard ELISA procedure (Thermo Fisher Scientific).  
998 Specifically we used anti-Citrullinated H3 antibody (1/1000 in PBS) as capture antibody  
999 and anti H3 tot-biot (KIT Cell death roche 1/200) as detection antibody.

1000

## 1001 **Preparation of neutrophil lysates and supernatant for immunoblot**

1002 At the end of the treatment 5 mM of diisopropylfluorophosphate (DFP) cell permeable  
1003 serine protease inhibitor was added to cell culture medium. Cell' Supernatant was  
1004 collected and clarified from non-adherent cells by centrifugation for 10 min at 300 g.  
1005 Cell pellet and adherent cells were lysed in 100 µL of RIPA buffer (150 mM NaCl,  
1006 50 mM Tris-HCl, 1% Triton X-100, 0.5% Na-deoxycholate) supplemented with 5 mM  
1007 diisopropylfluorophosphate (DFP) in addition to the protease inhibitor cocktail (Roche).  
1008 Cell scrapper was used to ensure optimal recovery of cell lysate. Collected cell lysate  
1009 was homogenized by pipetting up and down ten times and supplemented with laemli  
1010 buffer (1X final) before boiling sample for 10 min at 95°C. Soluble proteins from cell  
1011 supernatant fraction were precipitated as described previously (Eren et al., 2020).  
1012 Precipitated pellet was then resuspended in 100 µL of RIPA buffer plus laemli  
1013 supplemented with 5 mM diisopropylfluorophosphate (DFP) and protease inhibitor  
1014 cocktail (Roche) and heat denaturated for 10 min at 95°C. Cell lysate and cell  
1015 supernatant fraction were then analysed by immunoblot either individually or in pooled  
1016 sample of lysate plus supernatant (equal vol/vol).

1017

## 1018 **Treatment of Neutrophils for Immunofluorescences**

1019  $5 \cdot 10^5$  Cells were plated on 1.5 glass coverslips in 24 well plate and infected/treated as  
1020 described above. At the end of the assay, cell supernatant was removed and cells were  
1021 fixed with a 4% PFA solution (ref) for 10 min at 37°C. PFA was then removed and cells  
1022 were washed 3 times with HBSS. When desired, plasma membrane was stained with  
1023 Wheat Germ Agglutinin, Alexa Fluor<sup>TM</sup> 633 Conjugate (ThermoFisher Scientifique) at  
1024 1/100<sup>th</sup> dilution in HBSS, and incubated for 30 min under 100 rpm orbital shaking

1025 conditions. Then cells were washed with HBSS and processed for further staining.  
1026 Permeabilization was performed by incubating cells for 10 min in PBS containing 0.1%  
1027 Triton X-100. To block unspecific binding of the antibodies cells are Incubated in PBS-  
1028 T (PBS+ 0.1% Tween 20), containing 2% BSA, 22.52 mg/mL glycine in for 30 min. 3  
1029 washes with PBS-T was performed between each steps. Primary antibodies staining  
1030 was performed overnight at 4°C in BSA 2% - Tween 0.1% - PBS (PBS-T) solution.  
1031 Coverslips were washed three times with PBS-T and incubated with the appropriate  
1032 fluor-coupled secondary antibodies for 1 hour at room temperature. DNA was  
1033 counterstained with Hoechst. Cells were then washed three times with PBS and  
1034 mounted on glass slides using Vectashield (Vectalabs). Coverslips were imaged using  
1035 confocal Zeiss LSM 710 (INFINITY, Toulouse) or Olympus Spinning disk (Image core  
1036 Facility, IPBS, Toulouse) using a 63x oil objective. Unless specified, for each  
1037 experiment, 5-10 fields (~50-250 cells) were manually counted using Image J  
1038 software.

1039

#### 1040 **Scanning Electron Microscopy experiments**

1041 For scanning electron microscopy observations, cells were fixed with 2.5%  
1042 glutaraldehyde in 0.2M cacodylate buffer (pH 7.4). Preparations were then washed  
1043 three times for 5min in 0.2M cacodylate buffer (pH 7.4) and washed with distilled water.  
1044 Samples were dehydrated through a graded series (25 to 100%) of ethanol, transferred  
1045 in acetone and subjected to critical point drying with CO<sub>2</sub> in a Leica EM CPD300. Dried  
1046 specimens were sputter-coated with 3 nm platinum with a Leica EM MED020  
1047 evaporator and were examined and photographed with a FEI Quanta FEG250.

1048

#### 1049 **ImageStreamX**

1050 Cells isolated from peritoneal washes were pelleted by centrifugation (10 min at 300  
1051 g). Neutrophils were stained prior to fixation with anti-Ly6G (APC-Vio770, Miltenyi-  
1052 Biotec Clone: REA526 | Dilution: 1:50) in MACS buffer (PBS-BSA 0,5%-EDTA 2mM)  
1053 in presence of FC block (1/100) and Hoechst (1 µM). Then, cells were fixed in 4% PFA.  
1054 Data were acquired on ImageStreamXMKII (Amnis) device (CPTP Imaging and  
1055 Cytometry core facility) and analyzed using IDEAS software v2.6 (Amnis). The gating  
1056 strategy used to evaluate inflammasome activation in neutrophils was performed as  
1057 follow: (i) a gate was set on cells in focus [Cells in Focus] and (ii) a sub-gate was  
1058 created on single cells [Single Cells]. Then we gated first on (iii) LY6G+ Neutrophils

1059 [LY6G+] and second on (iv) ASC-citrine+ and Hoechst+ cells [Hoechst+/ASC-Citrine+]  
1060 within LY6G+ population. (v) To distinguish cells with active (ASC-speck) versus  
1061 inactive inflammasome (Diffuse ASC), we plotted the Intensity with the area of ASC-  
1062 citrine. This strategy allow to distinguish cells with active inflammasome that were  
1063 visualized and quantified. (**Fig S3E**).

1064

### 1065 **Mass spectrometry**

1066 Tryptic peptides were resuspended in 2% acetonitrile and 0.05% trifluoroacetic acid  
1067 and analyzed by nano-liquid chromatography (LC) coupled to tandem MS, using an  
1068 UltiMate 3000 system (NCS-3500RS Nano/Cap System; Thermo Fisher Scientific)  
1069 coupled to an Orbitrap Q Exactive Plus mass spectrometer (Thermo Fisher Scientific).  
1070 Around 1µg of each sample was loaded on a C18 precolumn (300 µm inner diameter  
1071 × 5 mm, Thermo Fisher Scientific) in a solvent made of 2% acetonitrile and 0.05%  
1072 trifluoroacetic acid, at a flow rate of 20 µl/min. After 5 min of desalting, the precolumn  
1073 was switched online with the analytical C18 column (75 µm inner diameter × 50 cm,  
1074 in-house packed with Reprosil C18) equilibrated in 95% solvent A (5% acetonitrile,  
1075 0.2% formic acid) and 5% solvent B (80% acetonitrile, 0.2% formic acid). Peptides  
1076 were eluted using a 5%-50% gradient of solvent B over 105 min at a flow rate of 300  
1077 nl/min. The mass spectrometer was operated in data-dependent acquisition mode with  
1078 the Xcalibur software. MS survey scans were acquired with a resolution of 70,000 and  
1079 an AGC target of 3e6. The 10 most intense ions were selected for fragmentation by  
1080 high-energy collision induced dissociation, and the resulting fragments were analyzed  
1081 at a resolution of 17500, using an AGC target of 1e5 and a maximum fill time of 50ms.  
1082 Dynamic exclusion was used within 30 s to prevent repetitive selection of the same  
1083 peptide.

1084

1085 **Data processing** Raw MS files were processed with the Mascot software (version  
1086 2.7.0) for database search and Proline (Bouyssie et al, Bioinformatics 2020) for label-  
1087 free quantitative analysis. Data were searched against *Mus musculus* entries of the  
1088 UniProtKB protein database (release UniProtKB/Swiss-Prot+TrEMBL 2020\_07, 87954  
1089 entries). Carbamidomethylation of cysteines was set as a fixed modification, whereas  
1090 oxidation of methionine and protein N-terminal acetylation were set as variable  
1091 modifications. Specificity of trypsin digestion was set for cleavage after K or R, and two  
1092 missed trypsin cleavage sites were allowed. The mass tolerance was set to 10 ppm for

1093 the precursor and to 20 mmu in tandem MS mode. Minimum peptide length was set to  
1094 7 amino acids, and identification results were further validated in Proline by the target  
1095 decoy approach using a reverse database at both a PSM and protein false-discovery  
1096 rate of 1%. For label-free relative quantification of the proteins across biological  
1097 replicates and conditions, cross-assignment of peptide ions peaks was enabled with a  
1098 match time window of 1 min, after alignment of the runs with a time window of +/- 600s.

1099

### 1100 **Statistical tests used**

1101 Statistical analysis was performed with Prism 8.0a (GraphPad Software, Inc.).  
1102 Otherwise specified, data are reported as mean with SEM. T-test with Bonferroni  
1103 correction was chosen for comparison of two groups. For in vivo mice experiments and  
1104 comparisons we used Mann-Whitney tests and mouse survival analysis were  
1105 performed using log-rank Cox-Mantel test. P values are shown in figures with the  
1106 following meaning; NS non-significant and Significance is specified as \* $p \leq 0.05$ ; \*\* $p \leq$   
1107  $0.01$ , \*\*\* $p \leq 0.001$ .

1108

1109

1110

1111

1112

1113

1114

1115

1116

1117

1118

1119

1120

1121

1122

1123

1124

1125 **Table reagents**

1126 Reagents and Tools are available upon request to [Etienne.meunier@ipbs.fr](mailto:Etienne.meunier@ipbs.fr) or  
 1127 Remi.planes@gmail.com

| REAGENT or RESSOURCE                                        | SOURCE                      | IDENTIFIER              |
|-------------------------------------------------------------|-----------------------------|-------------------------|
| <b>Antibodies</b>                                           |                             |                         |
| Anti- mouse Caspase 1, 1: 1000                              | AdipoGen                    | AG20B-0042              |
| Anti-Ly6G APC-Vio770, 1:50                                  | Miltenyi-Biotec             | <b>130-119-126</b>      |
| Anti- mouse Gasdermin D, 1: 1000                            | Abcam                       | AB209845                |
| Anti- mouse IL-1beta, 1: 1000                               | R&D Systems                 | AF-401-NA               |
| Anti-MPO , 1: 1000                                          | R&D Systems                 | AF3667                  |
| Anti-ASC, IF 1:100                                          | Novus                       | NBP1-78-977             |
| Anti-HMGB1, 1: 1000                                         | Genetex                     | GTX-101277              |
| Anti-HMGB1, 1: 1000                                         | abcam                       | ab18256                 |
| Anti- LaminB1, 1: 1000 Blots, 1:250 IF                      | abcam                       | AB229025 [EPR22165-121] |
| Anti-H3 citrullinated, 1: 1000 Blots, 1:250 IF              | abcam                       | AB5103                  |
| Anti-H3, 1: 1000                                            | Cell signalling Techonology | 3638S                   |
| Anti-H4, 1: 1000                                            | Cell signalling Techonology | 2935S                   |
| Anti-H2A, 1: 1000                                           | Cell signalling Techonology | 2578S                   |
| Anti-H1, 1: 1000                                            | Abcam                       | AB134914 [EPR6536]      |
| Anti-PAD4, 1: 1000                                          | Abcam                       | AB214810 [EPR20706]     |
| Anti-Neutrophil Elastase, 1: 1000                           | Abcam                       | AB68672                 |
| Anti-NLRC4 1: 1000                                          | Abcam                       | ab201792 [EPR19733]     |
| Anti-β-actin 1: 1000                                        | Cell signalling Techonology | 4967S                   |
| Anti-β-actin 1: 5000                                        | Sigma-Aldrich               | A1978                   |
| Goat anti-mouse HRP (1/4000)                                | SouthernBiotech             | 1034-05                 |
| Goat-anti-rabbit IgG (H+L), HRP conjugate (1/4000)          | Advansta                    | R-05072-500             |
| Rabbit anti-Goat IgG (H+L) Secondary Antibody, HRP (1/4000) | Invitrogen                  | 81-1620                 |
| Goat anti-rabbit IgG (H&L)Dylight 488 (1/1000)              | Immunoreagents              | GtxRb-003-D488NHSX      |
| Donkey anti-Rabbit IgG Dylight 550 (1/1000)                 | Immunoreagents              | DkxRb-003-D550NHSX      |
| Goat anti-mouse IgG Dylight 550 (1/1000)                    | Immunoreagents              | GtxMu-003-D550NHSX      |
| Goat anti-mouse IgG Dylight 488 (1/1000)                    | Immunoreagents              | GtxMu-003-D488NHSX      |
| Hoescht                                                     | Sigma-Aldrich               | H6024                   |
| WGA-Alexa 633 (1/100)                                       | Thermo Fisher Scientific    | W21404                  |
| Alexa Fluor™ 488 Phalloidin                                 | Thermo Fisher Scientific    | A12379                  |

| <b>RNA, DNA primers/sequences</b>                     |                              |                             |
|-------------------------------------------------------|------------------------------|-----------------------------|
| MRP8-Cre Fw primers                                   | CGCCGTAATCAATCGATGAGTTGCTTC  |                             |
| MRP8-Cre Rv primers                                   | GATGCCGGTGAACGTGCAAAACAGGCTC |                             |
| Casp1floxed Fw primers                                | CGAGGGTTGGAGCTCAAGTTGACC     |                             |
| Casp1floxed Rv primers                                | CACTTTGACTTCTCTAAGGACAG      |                             |
| <b>Chemicals, peptides and recombinant proteins</b>   |                              |                             |
| LPS E.Coli K12 (500ng/mL)                             | Invivogen                    | tlr1-pek1ps                 |
| FLA-Pa Ultrapure                                      | Invivogen                    | tlr1-pafla                  |
| Pam3CSK4 (200 ng/mL)                                  | Invivogen                    | tlr1-pm2s-1                 |
| DFP (5mM)                                             | Sigma-Aldrich                | D0879                       |
| Histone from calf thymus                              | Sigma Aldrich                | H9250-100MG                 |
| N-Acetylheparin sodium salt                           | Sigma Aldrich                | A8036-25MG                  |
| DNase I from bovine pancreas                          | Sigma Aldrich                | Cat. No. 11 284 932 001     |
| GSK484 (10µM)                                         | Cayman Chemical              | 17488                       |
| Latrunculin A (2µM)                                   | Sigma-Aldrich                | <b>428026</b>               |
| Jasplakinolide (200nM)                                | Santa Cruz Biotechnonology   | sc-202191                   |
| ZVAD (20µM)                                           | Invivogen                    | tlr1-vad                    |
| Y-VAD (40µM)                                          | Invivogen                    | inh-yvad                    |
| MAFP (20µM)                                           | Sigma                        | M2939                       |
| SYTOX™ Green Nucleic Acid Stain (100ng/mL)            | Thermo Fisher Scientific     | S7020                       |
| SYTOX™ Blue Nucleic Acid Stain (100ng/mL)             | Thermo Fisher Scientific     | S11348                      |
| PFA (4%)                                              | Sigma-Aldrich                | 1004969011                  |
| cOmplete™ Protease Inhibitor Cocktail                 | Sigma-Aldrich                | 11697498001                 |
| Lipofectamine-2000                                    | Thermo Fisher Scientific     | 11668019                    |
| Triton X-100                                          | Sigma-Aldrich                | X100-500ML                  |
| Newborn Calf Serum (FCS)                              | Thermo Fisher Scientific     | 16010159                    |
| DMEM                                                  | Gibco                        | <a href="#">11574486</a>    |
| HEPES                                                 | Invitrogen                   | <a href="#">15630080</a>    |
| Opti-MEM                                              | Gibco                        | 11524456                    |
| RPMI without phenol red                               | Gibco                        | 11564456                    |
| HBSS without Calcium, Magnesium or Phenol Red         | Gibco                        | 14-175-095                  |
| Clarity Max™ Western ECL Substrate                    | Bio-Rad                      | 1705062                     |
| Tris Base Ultrapure                                   | Euromedex                    | EU1018-A                    |
| SDS Ultrapure 4X                                      | Euromedex                    | 1012-A                      |
| Acrylamide / Bisacrylamide 37.5/1 30%                 | Euromedex                    | EU0088-B                    |
| TEMED                                                 | Sigma-Aldrich                | T9281                       |
| PageRuler™ Prestained Protein Ladder                  | Thermo Fisher Scientific     | 11822124                    |
| Vectashield                                           | Vectorlabs                   | H-1000-10                   |
| MACSxpress Whole Blood Neutrophil Isolation Kit human | Miltenyi Biotech             | 130-104-434                 |
| Anti-Ly-6G MicroBeads UltraPure, mouse                | Miltenyi Biotech             | <a href="#">130-120-337</a> |
| Neon™ Transfection System 100 µL Kit                  | Thermo Fisher Scientific     | MPK10096                    |
| <b>Critical comercial assays</b>                      |                              |                             |



|                                    |                          |             |
|------------------------------------|--------------------------|-------------|
| LDH Cytotoxicity Detection Kit     | Takara                   | MK401       |
| IL-1 beta Mouse Uncoated ELISA Kit | Thermo Fisher Scientific | 88-7013-88  |
| Cell death detection ELISA PLUS    | Sigma-Aldrich            | 11774425001 |

**Bacterial strains**

|               |            |                         |
|---------------|------------|-------------------------|
| PP34          | Ina Attrée | (Deruelle et al., 2020) |
| PP34ExoUS142A | Ina Attrée | (Deruelle et al., 2020) |
| PP34ExoU-     | Ina Attrée | (Deruelle et al., 2020) |
| PA14          | J Buyck    |                         |
| PA14EXOU-     | J Buyck    |                         |
| PA103         | J Buyck    |                         |
| PA103EXOU-    | J Buyck    |                         |

**Softwares**

|                             |
|-----------------------------|
| Prism v.8                   |
| FlowJo v.10                 |
| ImageLab                    |
| FiJi                        |
| IDEAS software v2.6 (Amnis) |

1128  
1129  
1130  
1131  
1132  
1133  
1134  
1135  
1136  
1137  
1138  
1139  
1140  
1141  
1142  
1143  
1144  
1145  
1146

**Supplemental information**

1147 **Table S1.** List of the identified enriched proteins in the supernatants of *P.*  
1148 *aeruginosa*<sup>ExoU</sup>/*P.aeruginosa*<sup>ExoUS142A</sup>-infected neutrophils (refers to **Figure 3D**).

1149

1150 **Movie S1.** Intravital microscopy visualization of granulocyte death in MRP8-GFP<sup>+</sup> mice  
1151 infected with 2.5.10<sup>5</sup> CFUs of *P. a*<sup>ExoU</sup> in presence of Sytox Blue for 10 hours.  
1152 Granulocyte death was observed in infected lungs by the appearance of Sytox blue  
1153 fluorescence. Pseudo colors represent vessels (gray, mTG); Granulocytes (Blue,  
1154 MRP8-GFP<sup>+</sup>); Dead cells (Yellow, Sytox blue). Scale bar: 20µm.

1155

1156 **Movie S2.** Intravital microscopy visualization of granulocyte death in MRP8-GFP<sup>+</sup> mice  
1157 infected with 2.5.10<sup>5</sup> CFUs of *P. a*<sup>ExoU</sup> or *P. a*<sup>ExoUS142A</sup> in presence of Sytox Blue for 10  
1158 hours. Granulocyte death was observed in infected lungs by the appearance of Sytox  
1159 blue fluorescence. Pseudo colors represent vessels (gray, mTG); Granulocytes (Blue,  
1160 MRP8-GFP<sup>+</sup>); Dead cells (Yellow, Sytox blue). Scale bar: 20µm.

1161

1162

A

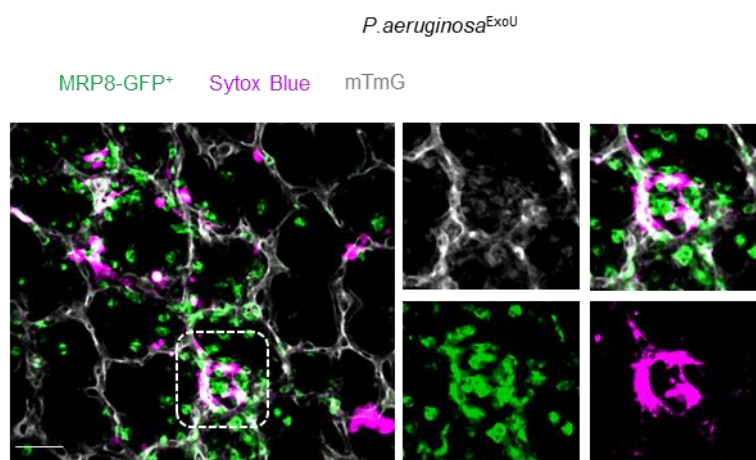

1163

1164

1165 **Figure S1. *P. aeruginosa*<sup>ExoU</sup> triggers NETosis in infected lungs**

1166 **A.** Infected MRP8-GFP<sup>+</sup> mice were imaged in presence of Sytox Blue for 10 hours and  
1167 granulocyte recruitment and death were observed in lungs by the appearance of Green  
1168 (GFP) and Sytox blue fluorescences. Pseudo colors represent vessels (gray, mTG);  
1169 Granulocytes (Blue, MRP8-GFP<sup>+</sup>); Dead cells (Yellow, Sytox blue). Scale bar: 20µm.

1170

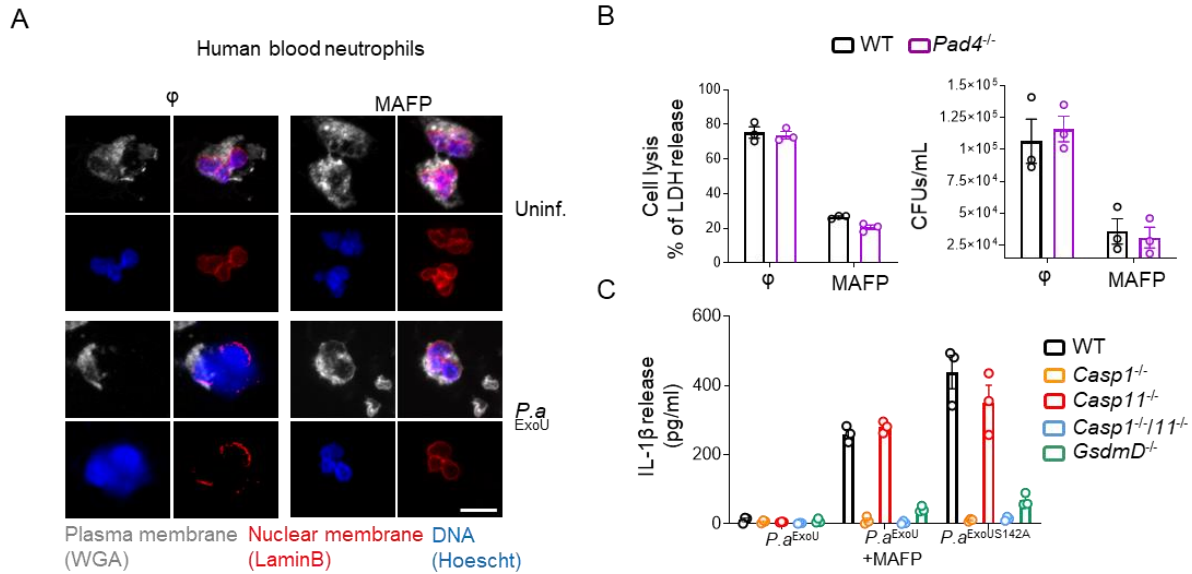

1171  
1172

**Figure S2. *P. aeruginosa*<sup>ExoU</sup> promotes PAD4-dependent neutrophil NETosis**

1173 **A.** Confocal microscopy observations of *P. a*<sup>ExoU</sup> (MOI 2)-infected human blood  
1174 neutrophils for 1h30 harboring decondensed DNA and destabilized nuclear membrane  
1175 (LaminB1). When specified MAFP (20μM) was added upon infection. Nucleus (blue)  
1176 was stained with Hoescht; LaminB1 is in red (anti LaminB1); plasma membrane is in  
1177 grey (WGA staining). Scale bar 10μm.

1178 **B.** Measure of cell lysis (release of LDH) and microbicidal activity of WT and *Pad4*<sup>-/-</sup>  
1179 murine BMNs infected for 3 hours with *P. a*<sup>ExoU</sup> (MOI 2). When specified MAFP (20μM)  
1180 was added upon infection. \*\*\**p* ≤ 0.001, T-test with Bonferroni correction. NS: Not  
1181 significant. Values are expressed as mean ± SEM.

1182 **C.** Measure of IL-1β release in WT, *Casp1*<sup>-/-</sup>, *Casp11*<sup>-/-</sup>, *Casp1*<sup>-/-</sup>*Casp11*<sup>-/-</sup>, *GsdmD*<sup>-/-</sup>  
1183 BMNs infected *P. a*<sup>ExoU</sup> or *P. a*<sup>ExoUS142A</sup> in presence or absence of MAFP (20μM) for 3  
1184 hours. \*\*\**p* ≤ 0.001, T-test with Bonferroni correction. Values are expressed as mean  
1185 ± SEM.

1186

1187

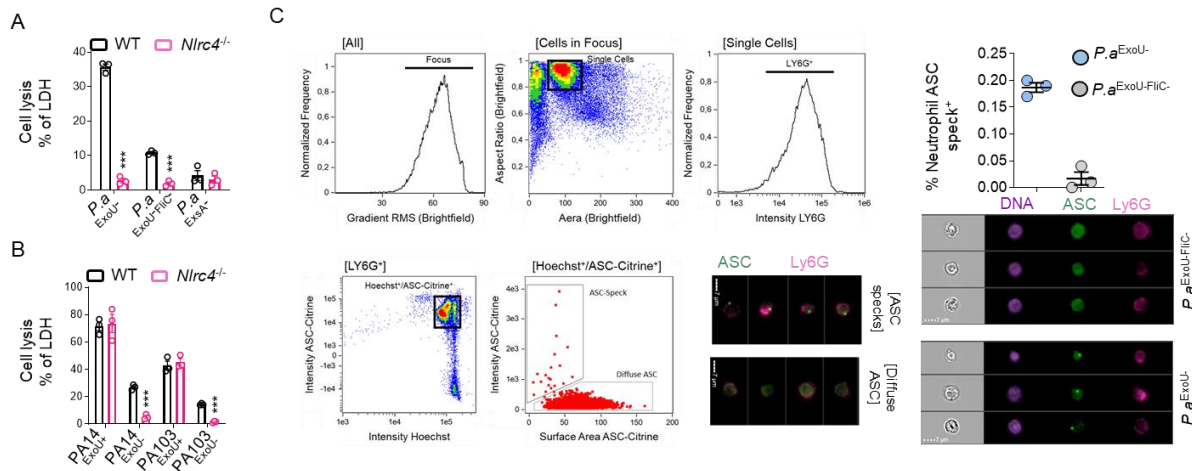

1188

1189 **Figure S3. Various *P. aeruginosa* strains elicit NLRC4-dependent pyroptosis of**  
 1190 **neutrophils**

1191 **A.** Measure of cell lysis (release of LDH) in WT and *Nlrc4*<sup>-/-</sup> BMNs infected for 3 hours  
 1192 with *P. a*<sup>ExoU-</sup>, *P. a*<sup>ExoU-FliC-</sup>, *P. a*<sup>ExsA-</sup> at a MOI of 2. \*\*\*p ≤ 0.001, T-test with Bonferroni  
 1193 correction. Values are expressed as mean ± SEM.

1194 **B.** Measure of cell lysis (release of LDH) in WT and *Nlrc4*<sup>-/-</sup> BMNs infected for 3 hours  
 1195 with PA14 (MOI 5) and PA103 (MOI10) *P. aeruginosa* strains expressing or not ExoU.  
 1196 \*\*\*p ≤ 0.001, T-test with Bonferroni correction. Values are expressed as mean ± SEM.

1197 **C.** Gating strategy and Imagestream experiments for *in vivo* detection of ASC specks  
 1198 in neutrophils in ASC-Citrine mice intranasally infected with 1.10<sup>5</sup> *P. a*<sup>ExoU-</sup> or *P. a*<sup>ExoU-</sup>  
 1199 FliC<sup>-</sup> for 6 hours. The gating strategy used to evaluate inflammasome activation in  
 1200 neutrophils was performed as follow: (i) a gate was set on cells in focus [Cells in Focus]  
 1201 and (ii) a sub-gate was created on single cells [Single Cells]. Then we gated first on  
 1202 (iii) LY6G+ Neutrophils [LY6G+] and second on (iv) ASC-citrine+ and Hoechst+ cells  
 1203 [Hoechst+/ASC-Citrine+] within LY6G+ population. (v) To distinguish cells with active  
 1204 (ASC-speck) versus inactive inflammasome (Diffuse ASC), we plotted the Intensity  
 1205 with the area of ASC-citrine. This strategy allow to distinguish cells with active  
 1206 inflammasome that were visualized and quantified. Values are expressed as mean ±  
 1207 SEM.

1208

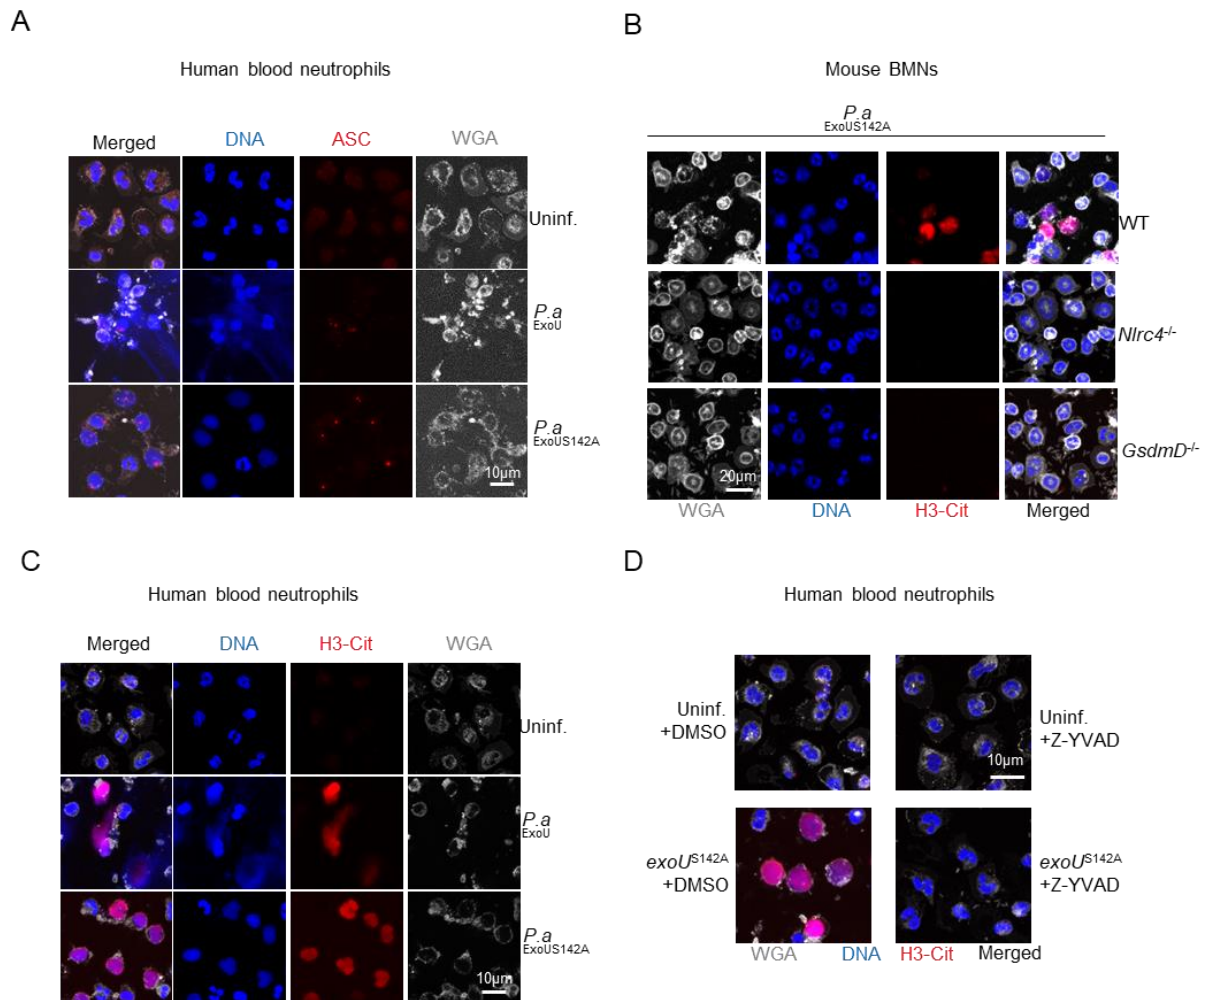

1209

1210 **Figure S4. Caspase-1-induced neutrophil pyroptosis does not generate**  
 1211 **extracellular traps.**

1212 **A.** Confocal microscopy observations of *P. a*<sup>ExoU-</sup> or *P. a*<sup>ExoUS142A-</sup>infected human blood  
 1213 neutrophils (MOI 2) for 3 hours harboring ASC complexes and decondensed DNA.  
 1214 Nucleus (blue) was stained with Hoescht; ASC is in red (anti LaminB1); plasma  
 1215 membrane is in grey (WGA staining). Scale bar 10µm.

1216 **B, C.** Confocal microscopy observations of DNA decondensation and expulsion and  
 1217 Histone-3 Citrullination (H3Cit) in *P. a*<sup>ExoU-</sup> or *P. a*<sup>ExoUS142A-</sup>infected (MOI 2) murine  
 1218 BMNs (**B**) or human blood neutrophils (**C**) for 3 hours. Nucleus (blue) was stained with  
 1219 Hoescht; Histone-3 Citrullination is in red (Anti-H3Cit staining); plasma membrane is  
 1220 in grey (WGA staining). Scale bar 10µm.

1221 **D.** Confocal microscopy observations of *P. a*<sup>ExoUS142A-</sup>infected human blood neutrophils  
 1222 (MOI 2) for 3 hours harboring H3-Cit and decondensed DNA in presence/absence of  
 1223 the Caspase-1 inhibitor Z-YVAD (40µM). Nucleus (blue) was stained with Hoescht; H3  
 1224 Cit is in red (anti H3 Cit); plasma membrane is in grey (WGA staining). Scale bar 10µm.

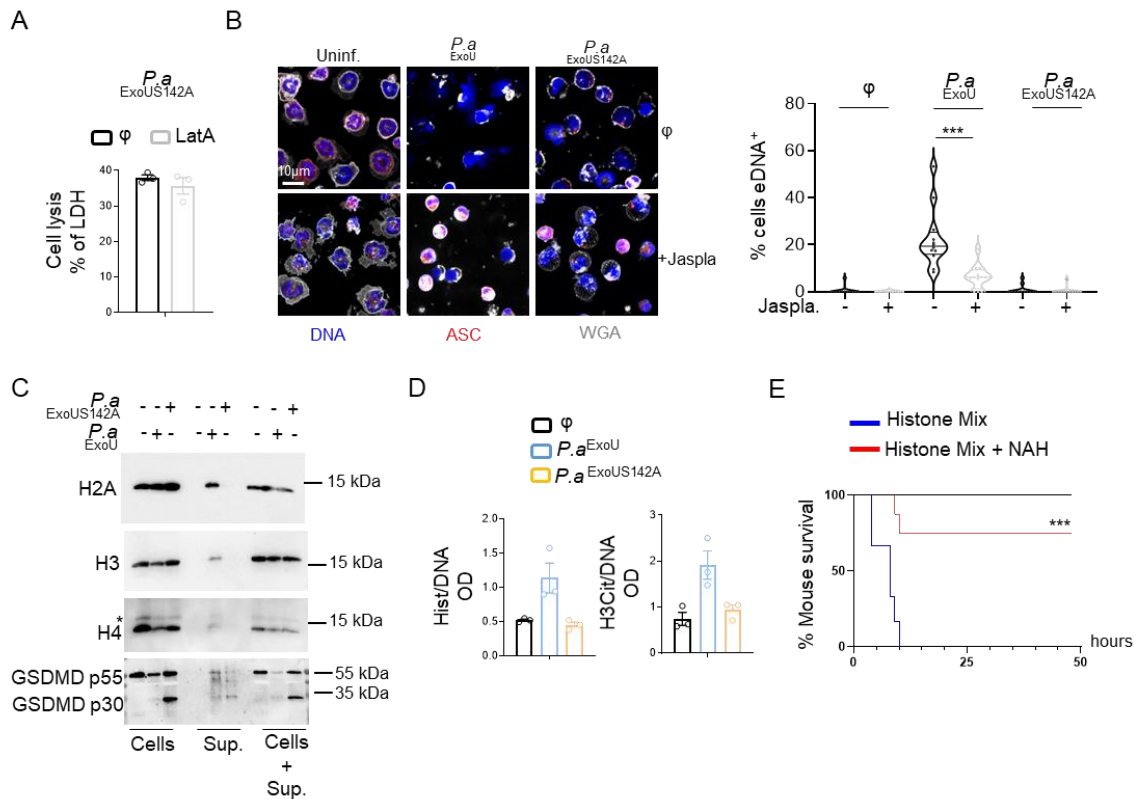

1225

1226 **Figure S5. Caspase-1-induced neutrophil pyroptosis restrains the extracellular**  
 1227 **release of Histones.**

1228 **A.** Measure of cell lysis (release of LDH) in WT BMNs infected for 3 hours with *P.*  
 1229 *a<sup>ExoUS142A</sup>* (MOI 2) in presence/absence of actin depolymerising molecule Latrunculin  
 1230 A (2 $\mu$ M) added 2 hours after infection. T-test with Bonferroni correction. NS: Not  
 1231 significant. Values are expressed as mean  $\pm$  SEM.

1232 **B.** Confocal microscopy observations and quantification of the presence or not of NETs  
 1233 in WT-ACS-Citrine BMNs infected for 3hours with *P. a<sup>ExoU</sup>* or *P. a<sup>ExoUS142A</sup>* or in  
 1234 presence or absence of Jasplakinolid (200nM, polymerized actin stabilizer). DNA (blue)  
 1235 was stained with Hoescht; ASC-Citrine is in red; plasma membrane is in grey (WGA  
 1236 staining). Scale bar 10 $\mu$ m. For quantifications, the percentage of cells with ASC  
 1237 positive structures (%ASC specks) or extracellular DNA (eDNA<sup>+</sup>) was determined by  
 1238 combining the ratios of cells positives for eDNA (outside from plasma membrane) over  
 1239 the total cellular counts from at least 10 fields from n=3 independent experiments.  
 1240 Values are expressed as mean  $\pm$  SEM.

1241 **C.** Immunoblotting observation of the release of Histones 2A, Histone-3, Histone 4 and  
 1242 GSDMD in supernatant or lysates from pyroptotic and NETotic BMNs infected for 3  
 1243 hours with *P. a<sup>ExoU</sup>* (MOI 0.5) or *P. a<sup>ExoUS142A</sup>* (MOI2). Immunoblots show separated

1244 lysates and supernatants as well as combined samples from one experiment  
1245 performed three times.

1246 **D.** Measure of Histone-3/DNA and Histone-3Cit/DNA complexes release in WT BMNs  
1247 infected for 3 hours with *P. a*<sup>ExoU</sup> (MOI 0.5) or *P. a*<sup>ExoUS142A</sup> (MOI 2). \*\*\* $p \leq 0.001$ , T-test  
1248 with Bonferroni correction. NS: Not significant. Values are expressed as mean  $\pm$  SEM.

1249 **E.** Determination of N-Acetyl Heparin (NAH, 20mg/kg)-inhibited toxicity of systemic  
1250 Histone injection (75mg/kg) in mice. Graphs represent one experiment (8 mice/group)  
1251 out of three independent *in vivo* experiments. Log-rank Cox-Mantel test was used for  
1252 survival comparisons. \*\*\* $p \leq 0.001$ .

1253

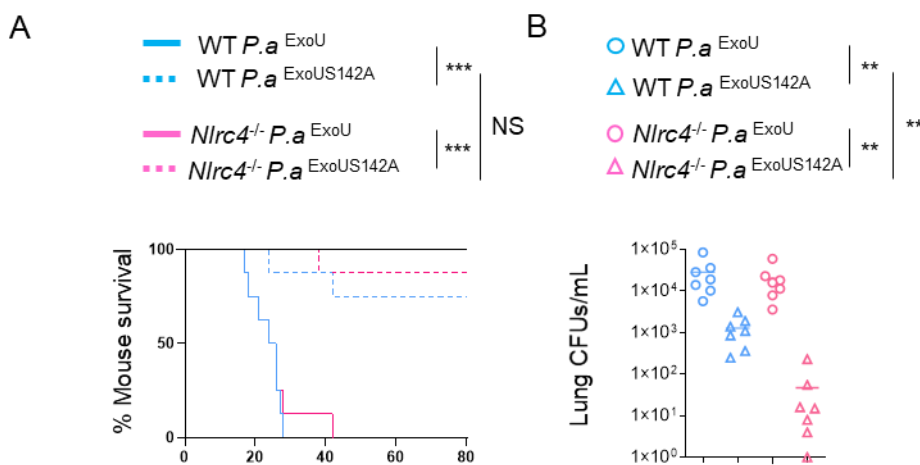

1254

1255 **Figure S6. Targeting both the NLRC4 Inflammasome and ExoU synergistically**  
1256 **improve *P. aeruginosa* elimination.**

1257 **A.** Survival of WT or *Nlrc4*<sup>-/-</sup> mice intranasally infected (n=8 animals per condition) with  
1258 5.10<sup>5</sup> CFUs of *P. a*<sup>ExoU</sup> or *P. a*<sup>ExoUS142A</sup>. Graphs represent one experiment (8  
1259 mice/group) out of three independent *in vivo* experiments. Log-rank Cox-Mantel test  
1260 was used for survival comparisons. \*\*\* $p \leq 0.001$ .

1261 **B.** Lung bacterial loads (colony forming units, CFUs) in WT or *Nlrc4*<sup>-/-</sup> mice intranasally  
1262 infected with 2.5.10<sup>5</sup> CFUs of *P. a*<sup>ExoU</sup> or *P. a*<sup>ExoUS142A</sup> for 24 hours. Graphs represent  
1263 one experiment (7 mice/group) out of three independent *in vivo* experiments; \*  $p \leq$   
1264 0.05, \*\* $p \leq 0.01$ , Mann-Whitney analysis test.

1265

1266

1267

1268

1269

1270 **References**

1271

1272 Apel, F., Andreeva, L., Knackstedt, L.S., Streeck, R., Frese, C.K., Goosmann, C.,  
1273 Hopfner, K.-P., and Zychlinsky, A. (2021). The cytosolic DNA sensor cGAS recognizes  
1274 neutrophil extracellular traps. *Sci. Signal.* *14*.

1275 Bagayoko, S., Leon Icaza, S., Pinilla, M., Hessel, A., Bordignon, P.-J., Moreau, F.,  
1276 Eren, E., Boyancé, A., Naser, E., Lefèvre, L., et al. (2021). Phospholipid peroxidation  
1277 fuels ExoU phospholipase-dependent cell necrosis 1 and supports *Pseudomonas*  
1278 *aeruginosa*-driven pathology 2. *BioRxiv* 2021.02.17.431580.

1279 Biron, B.M., Chung, C.-S., Chen, Y., Wilson, Z., Fallon, E.A., Reichner, J.S., and Ayala,  
1280 A. (2018). PAD4 Deficiency Leads to Decreased Organ Dysfunction and Improved  
1281 Survival in a Dual Insult Model of Hemorrhagic Shock and Sepsis. *J. Immunol.* *200*,  
1282 *ji1700639*.

1283 Bjanec, E., Sillas, R.G., Matsuda, R., Demarco, B., Fettlelet, T., Delaney, A.A.,  
1284 Rodriguez Lopez, E.M., Grubaugh, D., Wynosky-Dolfi, M.A., Philip, N.H., et al. (2021).  
1285 The Card19 locus of murine chromosome 13 regulates terminal cell lysis downstream  
1286 of caspase activation and Gasdermin-D cleavage Card19 locus regulates caspase-  
1287 dependent cell lysis. *BioRxiv* 2021.03.19.436207.

1288 Brinkmann, V., Reichard, U., Goosmann, C., Fauler, B., Uhlemann, Y., Weiss, D.S.,  
1289 Weinrauch, Y., and Zychlinsky, A. (2004). Neutrophil Extracellular Traps Kill Bacteria.  
1290 *Science* (80-. ). *303*, 1532–1535.

1291 Chen, K.W., Groß, C.J., Sotomayor, F.V., Stacey, K.J., Tschopp, J., Sweet, M.J., and  
1292 Schroder, K. (2014). The Neutrophil NLR4 Inflammasome Selectively Promotes IL-  
1293 1 $\beta$  Maturation without Pyroptosis during Acute Salmonella Challenge. *Cell Rep.* *8*,  
1294 570–582.

1295 Chen, K.W., Monteleone, M., Boucher, D., Sollberger, G., Ramnath, D., Condon, N.D.,  
1296 von Pein, J.B., Broz, P., Sweet, M.J., and Schroder, K. (2018). Noncanonical  
1297 inflammasome signaling elicits gasdermin D-dependent neutrophil extracellular traps.  
1298 *Sci. Immunol.* *3*, 6676.

1299 Chen, K.W., Demarco, B., Heilig, R., Ramos, S.P., Graczyk, J.P., Assenmacher, C.-  
1300 A., Radaelli, E., Joannas, L.D., Henao-Mejia, J., Brodsky, I.E., et al. (2021a). RIPK1  
1301 activates distinct gasdermins in macrophages and neutrophils upon pathogen  
1302 blockade of innate immune signalling. *BioRxiv* 2021.01.20.427379.

1303 Chen, W., Zhao, J., Mu, D., Wang, Z., Liu, Q., Zhang, Y., and Yang, D. (2021b).



1304 Pyroptosis Mediates Neutrophil Extracellular Trap Formation during Bacterial Infection  
1305 in Zebrafish. *J. Immunol.* *ji2001335*.

1306 Cohen, T.S., and Prince, A.S. (2013). Activation of inflammasome signaling mediates  
1307 pathology of acute *P. aeruginosa* pneumonia. *J. Clin. Invest.* *123*, 1630–1637.

1308 D’Cruz, A.A., Speir, M., Bliss-Moreau, M., Dietrich, S., Wang, S., Chen, A.A., Gavillet,  
1309 M., Al-Obeidi, A., Lawlor, K.E., Vince, J.E., et al. (2018). The pseudokinase MLKL  
1310 activates PAD4-dependent NET formation in necroptotic neutrophils. *Sci. Signal.* *11*,  
1311 1716.

1312 Demarco, B., Grayczyk, J.P., Bjanec, E., Roy, D. Le, Tonnus, W., Assenmacher, C.A.,  
1313 Radaelli, E., Fettlelet, T., Mack, V., Linkermann, A., et al. (2020). Caspase-8-  
1314 dependent gasdermin D cleavage promotes antimicrobial defense but confers  
1315 susceptibility to TNF-induced lethality. *Sci. Adv.* *6*, 3465–3483.

1316 Deruelle, V., Bouillot, S., Job, V., Taillebourg, E., Fauvarque, M.-O., Attrée, I., and  
1317 Huber, P. (2020). The bacterial toxin ExoU requires a host trafficking chaperone for  
1318 transportation and to induce necrosis. *BioRxiv* 2020.11.04.367706.

1319 Diaz, M.H., and Hauser, A.R. (2010). *Pseudomonas aeruginosa* cytotoxin ExoU is  
1320 injected into phagocytic cells during acute pneumonia. *Infect. Immun.* *78*, 1447–1456.

1321 Eren, E., Planès, R., Bagayoko, S., Bordignon, P., Chaoui, K., Hessel, A., Santoni, K.,  
1322 Pinilla, M., Lagrange, B., Burlet-Schiltz, O., et al. (2020). *Irgm2* and *Gate-16*  
1323 cooperatively dampen Gram-negative bacteria-induced caspase-11 response. *EMBO*  
1324 *Rep.* *21*, e50829.

1325 Evavold, C.L., Ruan, J., Tan, Y., Xia, S., Wu, H., and Kagan, J.C. (2018). The Pore-  
1326 Forming Protein Gasdermin D Regulates Interleukin-1 Secretion from Living  
1327 Macrophages. *Immunity* *48*, 35–44.e6.

1328 Evavold, C.L., Hafner-Bratkovič, I., and Kagan, J.C. (2020). Downstream of gasdermin  
1329 D cleavage, a Ragulator-Rag-mTORC1 pathway promotes pore formation and  
1330 pyroptosis. *BioRxiv* 2020.11.02.362517.

1331 Faure, E., Mear, J.-B., Faure, K., Normand, S., Couturier-Maillard, A., Grandjean, T.,  
1332 Balloy, V., Ryffel, B., Dessen, R., Chignard, M., et al. (2014). *Pseudomonas*  
1333 *aeruginosa* Type-3 Secretion System Dampens Host Defense by Exploiting the  
1334 NLRC4-coupled Inflammasome. *Am. J. Respir. Crit. Care Med.* *189*, 799–811.

1335 Fuchs, T.A., Brill, A., Duerschmied, D., Schatzberg, D., Monestier, M., Myers, D.D.,  
1336 Wroblewski, S.K., Wakefield, T.W., Hartwig, J.H., and Wagner, D.D. (2010).  
1337 Extracellular DNA traps promote thrombosis. *Proc. Natl. Acad. Sci. U. S. A.* *107*,

1338 15880–15885.

1339 Galluzzi, L., Vitale, I., Aaronson, S.A., Abrams, J.M., Adam, D., Agostinis, P., Alnemri,  
1340 E.S., Altucci, L., Amelio, I., Andrews, D.W., et al. (2018). Molecular mechanisms of cell  
1341 death: Recommendations of the Nomenclature Committee on Cell Death 2018. *Cell*  
1342 *Death Differ.* 25, 486–541.

1343 Van Gorp, H., Saavedra, P.H.V., De Vasconcelos, N.M., Van Opdenbosch, N., Walle,  
1344 L. Vande, Matusiak, M., Prencipe, G., Insalaco, A., Van Hauwermeiren, F., Demon, D.,  
1345 et al. (2016). Familial Mediterranean fever mutations lift the obligatory requirement for  
1346 microtubules in Pyrin inflammasome activation. *Proc. Natl. Acad. Sci. U. S. A.* 113,  
1347 14384–14389.

1348 Hauser, A.R., and Engel, J.N. (1999). *Pseudomonas aeruginosa* induces type-III-  
1349 secretion-mediated apoptosis of macrophages and epithelial cells. *Infect. Immun.* 67,  
1350 5530–5537.

1351 Headley, M.B., Bins, A., Nip, A., Roberts, E.W., Looney, M.R., Gerard, A., and  
1352 Krummel, M.F. (2016). Visualization of immediate immune responses to pioneer  
1353 metastatic cells in the lung. *Nature* 531, 513–517.

1354 Heilig, R., Dick, M.S., Sborgi, L., Meunier, E., Hiller, S., and Broz, P. (2018). The  
1355 Gasdermin-D pore acts as a conduit for IL-1 $\beta$  secretion in mice. *Eur. J. Immunol.* 48,  
1356 584–592.

1357 Henry, C.M., Sullivan, G.P., Clancy, D.M., Afonina, I.S., Kulms, D., and Martin, S.J.  
1358 (2016). Neutrophil-Derived Proteases Escalate Inflammation through Activation of IL-  
1359 36 Family Cytokines. *Cell Rep.* 14, 708–722.

1360 Howell, H.A., Logan, L.K., and Hauser, A.R. (2013). Type III secretion of ExoU is critical  
1361 during early *Pseudomonas aeruginosa* Pneumonia. *MBio* 4.

1362 Kahlenberg, J.M., Carmona-Rivera, C., Smith, C.K., and Kaplan, M.J. (2013).  
1363 Neutrophil Extracellular Trap–Associated Protein Activation of the NLRP3  
1364 Inflammasome Is Enhanced in Lupus Macrophages. *J. Immunol.* 190, 1217–1226.

1365 Karmakar, M., Minns, M., Greenberg, E.N., Diaz-Aponte, J., Pestonjamas, K.,  
1366 Johnson, J.L., Rathkey, J.K., Abbott, D.W., Wang, K., Shao, F., et al. (2020). N-  
1367 GSDMD trafficking to neutrophil organelles facilitates IL-1 $\beta$  release independently of  
1368 plasma membrane pores and pyroptosis. *Nat. Commun.* 11.

1369 Kayagaki, N., Kornfeld, O.S., Lee, B.L., Stowe, I.B., O’Rourke, K., Li, Q., Sandoval,  
1370 W., Yan, D., Kang, J., Xu, M., et al. (2021). NINJ1 mediates plasma membrane rupture  
1371 during lytic cell death. *Nature* 591, 131–136.

- 1372 Kenny, E.F., Herzig, A., Krüger, R., Muth, A., Mondal, S., Thompson, P.R., Brinkmann,  
1373 V., von Bernuth, H., and Zychlinsky, A. (2017). Diverse stimuli engage different  
1374 neutrophil extracellular trap pathways. *Elife* 6.
- 1375 Knackstedt, S.L., Georgiadou, A., Apel, F., Abu-Abed, U., Moxon, C.A., Cunnington,  
1376 A.J., Raupach, B., Cunningham, D., Langhorne, J., Krüger, R., et al. (2019). Neutrophil  
1377 extracellular traps drive inflammatory pathogenesis in malaria. *Sci. Immunol.* 4, 336.
- 1378 Knight, J.S., Shelef, M.A., Radic, M., Leppkes, M., Gößwein, S., Lindemann, A.,  
1379 Mahajan, A., Maueröder, C., Martini, E., Patankar, J., et al. (2019). Citrullination  
1380 Licenses Calpain to Decondense Nuclei in Neutrophil Extracellular Trap Formation.  
1381 *Front. Immunol. | Wwww.Frontiersin.Org* 10, 2481.
- 1382 Kovacs, S.B., Oh, C., Maltez, V.I., McGlaughon, B.D., Verma, A., Miao, E.A., and  
1383 Aachoui, Y. (2020). Neutrophil Caspase-11 Is Essential to Defend against a Cytosol-  
1384 Invasive Bacterium. *Cell Rep.* 32.
- 1385 Kumar, S.V.R., Kulkarni, O.P., Mulay, S.R., Darisipudi, M.N., Romoli, S., Thomasova,  
1386 D., Scherbaum, C.R., Hohenstein, B., Hugo, C., Müller, S., et al. (2015). Neutrophil  
1387 extracellular trap-related extracellular histones cause vascular necrosis in severe GN.  
1388 *J. Am. Soc. Nephrol.* 26, 2399–2413.
- 1389 Kumari, P., Russo, A.J., Wright, S.S., Muthupalani, S., Correspondence, V.A.R., and  
1390 Rathinam, V.A. (2021). Hierarchical cell-type-specific functions of caspase-11 in LPS  
1391 shock and antibacterial host defense.
- 1392 Lefrançais, E., Mallavia, B., Zhuo, H., Calfee, C.S., and Looney, M.R. (2018).  
1393 Maladaptive role of neutrophil extracellular traps in pathogen-induced lung injury. *JCI*  
1394 *Insight* 3.
- 1395 Li, P., Allen, H., Banerjee, S., Franklin, S., Herzog, L., Johnston, C., McDowell, J.,  
1396 Paskind, M., Rodman, L., Salfeld, J., et al. (1995). Mice deficient in IL-1 $\beta$ -converting  
1397 enzyme are defective in production of mature IL-1 $\beta$  and resistant to endotoxic shock.  
1398 *Cell* 80, 401–411.
- 1399 Li, P., Li, M., Lindberg, M.R., Kennett, M.J., Xiong, N., and Wang, Y. (2010). PAD4 is  
1400 essential for antibacterial innate immunity mediated by neutrophil extracellular traps.  
1401 *J. Exp. Med.* 207, 1853–1862.
- 1402 Li, Y., Li, M., Weigel, B., Mall, M., Werth, V.P., and Liu, M. (2020). Nuclear envelope  
1403 rupture and NET formation is driven by PKC $\alpha$ -mediated lamin B disassembly. *EMBO*  
1404 *Rep.* 21, e48779.
- 1405 Looney, M.R., Thornton, E.E., Sen, D., Lamm, W.J., Glenny, R.W., and Krummel, M.F.

1406 (2011). Stabilized imaging of immune surveillance in the mouse lung. *Nat. Methods* **8**,  
1407 91–96.

1408 Maltez, V.I., Tubbs, A.L., Cook, K.D., Achoui, Y., Falcone, E.L., Holland, S.M.,  
1409 Whitmire, J.K., and Miao, E.A. (2015). Inflammasomes Coordinate Pyroptosis and  
1410 Natural Killer Cell Cytotoxicity to Clear Infection by a Ubiquitous Environmental  
1411 Bacterium. *Immunity* **43**, 987–997.

1412 Man, S.M., Ekpenyong, A., Tourlomousis, P., Achouri, S., Cammarota, E., Hughes, K.,  
1413 Rizzo, A., Ng, G., Wright, J.A., Cicuta, P., et al. (2014a). Actin polymerization as a key  
1414 innate immune effector mechanism to control Salmonella infection. *Proc. Natl. Acad.*  
1415 *Sci. U. S. A.* **111**, 17588–17593.

1416 Man, S.M., Hopkins, L.J., Nugent, E., Cox, S., Glück, I.M., Tourlomousis, P., Wright,  
1417 J.A., Cicuta, P., Monie, T.P., and Bryant, C.E. (2014b). Inflammasome activation  
1418 causes dual recruitment of NLRC4 and NLRP3 to the same macromolecular complex.  
1419 *Proc. Natl. Acad. Sci. U. S. A.* **111**, 7403–7408.

1420 Martinod, K., Fuchs, T.A., Zitomersky, N.L., Wong, S.L., Demers, M., Gallant, M.,  
1421 Wang, Y., and Wagner, D.D. (2015). PAD4-deficiency does not affect bacteremia in  
1422 polymicrobial sepsis and ameliorates endotoxemic shock. *Blood* **125**, 1948–1956.

1423 Martinon, F., Pétrilli, V., Mayor, A., Tardivel, A., and Tschopp, J. (2006). Gout-  
1424 associated uric acid crystals activate the NALP3 inflammasome. *Nature* **440**, 237–241.

1425 Metzler, K.D., Goosmann, C., Lubojemska, A., Zychlinsky, A., and Papayannopoulos,  
1426 V. (2014). Myeloperoxidase-containing complex regulates neutrophil elastase release  
1427 and actin dynamics during NETosis. *Cell Rep.* **8**, 883–896.

1428 Neubert, E., Meyer, D., Rocca, F., Günay, G., Kwaczala-Tessmann, A., Grandke, J.,  
1429 Senger-Sander, S., Geisler, C., Egner, A., Schön, M.P., et al. (2018). Chromatin  
1430 swelling drives neutrophil extracellular trap release. *Nat. Commun.* **9**, 1–13.

1431 Nichols, R.D., Von Moltke, J., and Vance, R.E. (2017). NAIP/NLRC4 inflammasome  
1432 activation in MRP8+ cells is sufficient to cause systemic inflammatory disease. *Nat.*  
1433 *Commun.* **8**, 1–12.

1434 Ozer, E.A., Nnah, E., Dldelot, X., Whitaker, R.J., Hauser, A.R., and Ochman, H. (2019).  
1435 The Population Structure of *Pseudomonas aeruginosa* Is Characterized by Genetic  
1436 Isolation of *exoU*+ and *exoS*+ Lineages. *Genome Biol. Evol.* **11**, 1780–1796.

1437 Papayannopoulos, V., Metzler, K.D., Hakkim, A., and Zychlinsky, A. (2010). Neutrophil  
1438 elastase and myeloperoxidase regulate the formation of neutrophil extracellular traps.  
1439 *J. Cell Biol.* **191**, 677–691.

- 1440 Phillips, R.M., Six, D.A., Dennis, E.A., and Ghosh, P. (2003). In Vivo Phospholipase  
1441 Activity of the *Pseudomonas aeruginosa* Cytotoxin ExoU and Protection of Mammalian  
1442 Cells with Phospholipase A2 Inhibitors. *J. Biol. Chem.* *278*, 41326–41332.
- 1443 Phulphagar, K., Kühn, L.I., Ebner, S., Frauenstein, A., Swietlik, J.J., Rieckmann, J.,  
1444 and Meissner, F. (2021). Proteomics reveals distinct mechanisms regulating the  
1445 release of cytokines and alarmins during pyroptosis. *Cell Rep.* *34*, 108826.
- 1446 Rühl, S., Shkarina, K., Demarco, B., Heilig, R., Santos, J.C., and Broz, P. (2018).  
1447 ESCRT-dependent membrane repair negatively regulates pyroptosis downstream of  
1448 GSDMD activation. *Science (80-. )*. *362*, 956–960.
- 1449 Ryu, J.C., Kim, M.J., Kwon, Y., Oh, J.H., Yoon, S.S., Shin, S.J., Yoon, J.H., and Ryu,  
1450 J.H. (2017). Neutrophil pyroptosis mediates pathology of *P. aeruginosa* lung infection  
1451 in the absence of the NADPH oxidase NOX2. *Mucosal Immunol.* *10*, 757–774.
- 1452 Sato, H., Frank, D.W., Hillard, C.J., Feix, J.B., Pankhaniya, R.R., Moriyama, K., Finck-  
1453 Barbançon, V., Buchaklian, A., Lei, M., Long, R.M., et al. (2003). The mechanism of  
1454 action of the *Pseudomonas aeruginosa*-encoded type III cytotoxin, ExoU. *EMBO J.* *22*,  
1455 2959–2969.
- 1456 Silvestre-Roig, C., Braster, Q., Wichapong, K., Lee, E.Y., Teulon, J.M., Berrebeh, N.,  
1457 Winter, J., Adrover, J.M., Santos, G.S., Froese, A., et al. (2019). Externalized histone  
1458 H4 orchestrates chronic inflammation by inducing lytic cell death. *Nature* *569*, 236–  
1459 240.
- 1460 Sollberger, G., Choidas, A., Burn, G.L., Habenberger, P., Lucrezia, R. Di, Kordes, S.,  
1461 Menninger, S., Eickhoff, J., Nussbaumer, P., Klebl, B., et al. (2018). Gasdermin D plays  
1462 a vital role in the generation of neutrophil extracellular traps. *Sci. Immunol.* *3*.
- 1463 Sutterwala, F.S., Mijares, L.A., Li, L., Ogura, Y., Kazmierczak, B.I., and Flavell, R.A.  
1464 (2007). Immune recognition of *Pseudomonas aeruginosa* mediated by the  
1465 IPAF/NLRC4 inflammasome. *J. Exp. Med.* *204*, 3235–3245.
- 1466 Thiam, H.R., Wong, S.L., Wagner, D.D., and Waterman, C.M. (2020). Cellular  
1467 Mechanisms of NETosis. *Annu. Rev. Cell Dev. Biol.* *36*, 191–218.
- 1468 Thiam, H.R., Wong, S.L., Qiu, R., Kittisopikul, M., Vahabikashi, A., Goldman, A.E.,  
1469 Goldman, R.D., Wagner, D.D., and Waterman, C.M. (2020). NETosis proceeds by  
1470 cytoskeleton and endomembrane disassembly and PAD4-mediated chromatin  
1471 decondensation and nuclear envelope rupture. *Proc. Natl. Acad. Sci. U. S. A.* *117*,  
1472 7326–7337.
- 1473 Tsuchiya, K., Hosojima, S., Hara, H., Kushiyama, H., Mahib, M.R., Kinoshita, T., and

- 1474 Suda, T. (2021). Gasdermin D mediates the maturation and release of IL-1 $\alpha$   
1475 downstream of inflammasomes. *Cell Rep.* *34*, 108887.
- 1476 Wang, S., Miura, M., Jung, Y.K., Zhu, H., Li, E., and Yuan, J. (1998). Murine caspase-  
1477 11, an ICE-interacting protease, is essential for the activation of ICE. *Cell* *92*, 501–509.
- 1478 Wang, Y., Li, M., Stadler, S., Correll, S., Li, P., Wang, D., Hayama, R., Leonelli, L.,  
1479 Han, H., Grigoryev, S.A., et al. (2009). Histone hypercitrullination mediates chromatin  
1480 decondensation and neutrophil extracellular trap formation. *J. Cell Biol.* *184*, 205–213.
- 1481 Weinrauch, Y., Drujan, D., Shapiro, S.D., Weiss, J., and Zychlinsky, A. (2002).  
1482 Neutrophil elastase targets virulence factors of enterobacteria. *Nature* *417*, 91–94.
- 1483 Wen, Z., Lei, Z., Yao, L., Jiang, P., Gu, T., Ren, F., Liu, Y., Gou, C., Li, X., and Wen,  
1484 T. (2016). Circulating histones are major mediators of systemic inflammation and  
1485 cellular injury in patients with acute liver failure. *Cell Death Dis.* *7*, e2391–e2391.
- 1486 Wildhagen, K.C.A.A., De Frutos, P.G., Reutelingsperger, C.P., Schrijver, R., Aresté,  
1487 C., Ortega-Gómez, A., Deckers, N.M., Hemker, H.C., Soehnlein, O., and Nicolaes,  
1488 G.A.F. (2014). Nonanticoagulant heparin prevents histone-mediated cytotoxicity in  
1489 vitro and improves survival in sepsis. *Blood* *123*, 1098–1101.
- 1490 Xia, S., Zhang, Z., Magupalli, V.G., Pablo, J.L., Dong, Y., Vora, S.M., Wang, L., Fu,  
1491 T.M., Jacobson, M.P., Greka, A., et al. (2021). Gasdermin D pore structure reveals  
1492 preferential release of mature interleukin-1. *Nature* 1–5.
- 1493 Xu, J., Zhang, X., Pelayo, R., Monestier, M., Ammollo, C.T., Semeraro, F., Taylor, F.B.,  
1494 Esmon, N.L., Lupu, F., and Esmon, C.T. (2009). Extracellular histones are major  
1495 mediators of death in sepsis. *Nat. Med.* *15*, 1318–1321.
- 1496 Xu, Z., Huang, Y., Mao, P., Zhang, J., and Li, Y. (2015). Sepsis and ARDS: The Dark  
1497 Side of Histones. *Mediators Inflamm.* *2015*.
- 1498 Yan, H., Zhou, H.F., Akk, A., Hu, Y., Springer, L.E., Ennis, T.L., and Pham, C.T.N.  
1499 (2016). Neutrophil Proteases Promote Experimental Abdominal Aortic Aneurysm via  
1500 Extracellular Trap Release and Plasmacytoid Dendritic Cell Activation. *Arterioscler.*  
1501 *Thromb. Vasc. Biol.* *36*, 1660–1669.
- 1502 Zhang, Y., Zhao, Z., Guan, L., Mao, L., Li, S., Guan, X., Chen, M., Guo, L., Ding, L.,  
1503 Cong, C., et al. (2014). N-acetyl-heparin attenuates acute lung injury caused by acid  
1504 aspiration mainly by antagonizing histones in mice. *PLoS One* *9*, 97074.
- 1505 Zhao, Y., Yang, J., Shi, J., Gong, Y.N., Lu, Q., Xu, H., Liu, L., and Shao, F. (2011). The  
1506 NLRC4 inflammasome receptors for bacterial flagellin and type III secretion apparatus.  
1507 *Nature* *477*, 596–602.

1508
